1 **Discordant population structure inferred from male- and female-**  
2 **type mtDNAs from *Limecola balthica*, a bivalve species**  
3 **characterized by doubly uniparental inheritance of mitochondria**

4  
5 <sup>1</sup>Le Cam Sabrina, <sup>1,2</sup>Brémaud Julie, <sup>1</sup>Becquet Vanessa, <sup>1</sup>Huet Valérie, <sup>1</sup>Garcia Pascale,  
6 <sup>1,3</sup>Viricel Amélie, <sup>2</sup>Breton Sophie, <sup>1,3</sup>Pante Eric

7  
8 <sup>1</sup>Laboratoire Littoral Environnement et Sociétés (LIENSs), UMR 7266 CNRS-LRU, 17000  
9 La Rochelle, France

10 <sup>2</sup>Département de sciences biologiques, Université de Montréal, Montréal, QC, Canada

11 <sup>3</sup>Laboratoire des Sciences de l'Environnement Marin (LEMAR), UMR 6539 CNRS-UBO-  
12 IRD-Ifremer, Institut Universitaire Européen de la Mer, 29280 Plouzané, France

13

14 Corresponding author: [eric.pante@cnrs.fr](mailto:eric.pante@cnrs.fr)

15

16 **Abstract**

17

18 Doubly Uniparental Inheritance (DUI) of mitochondria is a remarkable exception to the  
19 Strictly Maternal Inheritance (SMI) in metazoans. In species characterized by DUI --almost  
20 exclusively gonochoric bivalve mollusks--, females (F) transmit mitochondria to offspring of  
21 both sexes, while males (M) pass on their mitochondria exclusively to their sons. Under DUI,  
22 males are heteroplasmic, somatic tissues containing F-transmitted mtDNA and gametic cells  
23 containing M-transmitted mtDNAs. The aforementioned transmission routes make M- and F-  
24 transmitted mtDNA interesting as sex-specific markers which can differ in their effective  
25 population sizes, mutation rates, and selective constraints. For these reasons, looking at both  
26 markers can provide significant insight into the genetic structure of populations and  
27 investigate its determinants. In this study, we document differences in genetic diversity,  
28 divergence, inter-populational genetic differentiation and biogeographic structure between  
29 M- and F-type *cox1* mt genes in the Baltic tellin (*Limecola balthica*) to test whether *cox1m*  
30 and *cox1f* genes bear the marks of similar phylogeographic histories. Both markers were  
31 sequenced for 313 male individuals sampled from the Baltic Sea to the Gironde Estuary  
32 (Southern France). Haplotype diversity and net divergence were over twice higher in *cox1m*

33 compared to *coxIf*. A strong southward decrease in nucleotide diversity was observed only at  
34 *coxIm*. Genetic differentiation between northern and southern populations was nearly 3 times  
35 higher at *coxIm* compared to *coxIf* (global  $\Phi_{ST} = 0.447$  and 0.126 respectively) and the  
36 geographic localization of the strongest genetic break significantly differed between the  
37 markers (Finistère Peninsula at *coxIf*; Cotentin Peninsula at *coxIm*). A higher mutation rate,  
38 relaxed negative selective pressure and differences in effective population sizes (depending  
39 on locations) at *coxIm* could explain differences in population genetic structure. As both F-  
40 and M-type mtDNAs interact with nuclear genes for oxidative phosphorylation and ATP  
41 production, geographical discordances in genetic clines could be linked to mito-nuclear  
42 genetic incompatibilities in this system.

43

#### 44 **Keywords**

45 Doubly Uniparental Inheritance, disruption, heteroplasmy, comparative biogeography,  
46 phylogeography, discordance, hybrid zone, genetic cline, mitochondria

47

#### 48 **Introduction**

49 Some species show a remarkable exception to the maternal inheritance of mitochondria in  
50 metazoans: the doubly uniparental mode of inheritance (DUI). In this system, both males and  
51 females are able to transmit their mitochondria. The former transmits “female-inherited” (F-  
52 type) mitochondria to all their progeny and the latter pass on “male-inherited” (M-type)  
53 mitochondria to their male offspring, where the male mitogenomes (mt) are quartered in male  
54 germ line and gametes (reviewed in Zouros, 2013). To date, DUI species have only been  
55 discovered in the class Bivalvia, with over 100 DUI species (Gusman et al 2016) among the  
56 about 11,000 contained in this taxon (Huber 2010, 2015). They are all gonochoric, except for  
57 the hermaphroditic mussel *Semimytilus algosus* (Lubosny et al 2020). More than a simple  
58 peculiarity, DUI is suspected to play a role in sex-determination and gonad differentiation  
59 (Zouros 2000, Breton et al 2011, Guerra et al 2017, Capt et al 2018, 2019), and could well be  
60 involved in population structure through intrinsic (*e.g.* genetic incompatibilities; Saavedra et  
61 al 1996) and extrinsic (*e.g.* selection and demography, Stewart et al 1996) factors.

62 In DUI species, the divergence between F-type and M-type mitogenomes is variable  
63 but generally high, ranging from 6 to over 50% (reviewed in Breton et al 2007 and Gusman et  
64 al 2016), which questions the maintenance of mito-nuclear genetic coadaptation. Indeed, both  
65 F- and M-type mitochondria can be found in males and females but in majority, females are

66 homoplasmic for the F-type mtDNA whereas males are heteroplasmic, accommodating two  
67 highly divergent mitogenomes (F-type in somatic tissues and M-type in sperm). The presence  
68 of the M-type mtDNA in somatic tissues is considered as a paternal leak due to elimination or  
69 segregation failure of sperm mitochondria in female or male embryos, respectively (Milani et  
70 al 2012). Both F- and M-type mt lineages show rapid molecular evolution compared to other  
71 animals, the M-type mtDNA usually evolving faster than the F-type mtDNA (Zouros et al  
72 2013). Coevolution and coadaptation of mitochondrial and nuclear genes are required for  
73 efficient cellular energy production (*i.e.* oxidative phosphorylation OXPHOS) and mito-  
74 nuclear genetic incompatibilities (MNIs) can lead to a desynchronization of this machinery  
75 (Burton & Baretto 2012,2013). Therefore, DUI offers tremendous potential for genetic  
76 incompatibilities to develop, in particular, in inter-populational hybrids, as a network of cyto-  
77 nuclear interactions exists (Saavedra et al 1996): mito-genetic incompatibilities can be  
78 expressed not only between the F-type and nuclear genes (in somatic tissues and oocytes in  
79 females), but also between the M-type and nuclear genes in sperm. Recombination between  
80 M- and F-types can further complicate mito-nuclear dynamics (reviewed in Zouros 2013).  
81 DUI could, therefore, bear on the maintenance of genetic structure among populations of  
82 highly dispersive bivalve species at small spatial scales, and provide key insight into the  
83 establishment and maintenance of local adaptation. While significant efforts have been made  
84 in the recent years to comprehend how DUI works and how it evolved (*e.g.* Breton et al 2007,  
85 2014; Zouros, 2013, Zouros 2020), little information is available on how it might participate  
86 to reproductive isolation.

87 Thus, barriers to gene flow can arise and be maintained by a multitude of  
88 environmental and/or intrinsic factors (Barberousse et al 2010), from ecological isolation to  
89 genetic incompatibilities. Hybrid zones, which correspond to transition regions between  
90 spatially separated genetic stocks, are “natural laboratories” to study the interactions between  
91 intrinsic barriers and the environment, and the processes of adaptation and speciation.

92 *Limecola balthica* (previously known as *Macoma balthica*, Huber, 2015), a species in  
93 which DUI has recently been detected (Pante et al 2017), is a noteworthy model species to  
94 study hybrid zones in marine ecosystems (Strelkov et al 2007, Riginos & Cunningham 2007).  
95 It has a wide distribution range spanning from the west pacific coasts, in Japan and from  
96 Alaska to Oregon (USA, Luttikhuizen, 2003) to the North Atlantic, where the species is  
97 found in the west from Arctic to Virginia (USA; Meehan, 1985) and in the east from the  
98 north of Russia (Hummel et al, 1997) to the Arcachon Basin (Hily 2013 and this publication).  
99 The succession of glaciation and inter-glaciation periods has resulted in colonization events

100 of the Atlantic marked by repeated isolation, invasion, and re-colonization events (Nikula et  
101 al, 2007). These episodic colonization events have created multiple opportunities for  
102 secondary contacts between different genetic stocks and the establishment of several hybrid  
103 zones in the Atlantic. Two subspecies of *L. balthica* co-occur in North Atlantic: a Pacific  
104 lineage (*L. balthica balthica*) present in the Baltic Sea and the White Sea, and an Atlantic  
105 lineage (*L. balthica rubra*) present in the Norwegian Sea, the North Sea and along the British  
106 coasts, down to the southern range limit of the species (Väinölä 2003, Lutikhuisen et al  
107 2003, Nikula et al 2008). In Europe, genetic breaks were described in the Kattegat-Detroit  
108 between Sweden and Denmark (Nikula et al. 2007, 2008) and in the North Finistère between  
109 the Channel and the Atlantic Ocean. Southern populations of *L. balthica rubra* exhibit F-type  
110 mtDNA signatures consistent with long-term isolation in the glacial refugium of the Bay of  
111 Biscay: high genetic diversity relative to previously-glaciated areas, high prevalence of  
112 private alleles, and a sharp genetic break separating them from northern populations (Becquet  
113 et al 2012). Multiple genes involved in the oxidative phosphorylation (OXPHOS) system  
114 (including genes coding for ATP synthase subunits and an ADP/ATP transporter were  
115 detected as significantly differentiated among southern and northern populations by an  $F_{ST}$   
116 scan (Pante et al 2012, 2019). These results suggested that incompatibilities between  
117 mitochondrial and nuclear genes encoding OXPHOS functions could be involved in  
118 endogenous barriers to gene flow in *L. balthica*.

119 Here, we present sharp differences in genetic diversity, divergence and population  
120 genetic structure between F- and M-type mtDNAs of *L. balthica* male individuals, in  
121 particular along the northeast Atlantic hybrid zone first described in Becquet et al (2012).  
122 Given the typically higher evolution rate and the potentially relaxed selection pressures acting  
123 on the M-type mitogenome, these comparative data allow us to start testing whether  
124 mitotypes are sufficiently different to cause genetic incompatibilities impeding gene flow in  
125 *L. balthica*.

126

## 127 **Materials and Methods**

128

### 129 **Sampling**

130 Individuals were collected from a total of 17 sampling sites ranging from Arcachon (southern  
131 range limit of the species, France) to Le Crotoy (Somme Bay, northern France) and from  
132 Kruiningen (the Netherlands) to Umea (Swedish Baltic Sea) (Table S1). Individuals from

133 sampling sites on the French coasts were treated as follows: 70 to 100 adults from 11 mm to  
134 23 mm were randomly collected live at sexual maturity between 4th and 23rd of April 2018  
135 at 9 locations ranging from the Bay of Biscay in southern France to Somme Bay (Table S1).  
136 Individuals were then held in aquaria until dissection at the LIENSs laboratory (LIttoral  
137 ENvironnement et Sociétés) in La Rochelle, France, with water temperature maintained at  
138 10°C. They were fed with a multispecific microalgal mixture every other day and dead or  
139 dying individuals were removed daily if necessary. For each individual, the adductor muscle  
140 was carefully severed to separate the two valves, without damaging the gonad, and a sample  
141 of the mantle was taken. Sex and gonadal maturation stage were determined with a dissecting  
142 microscope (x100 to x400). For each individual, two types tissue samples were collected, a  
143 gonadic sample and a somatic sample (mantle). All tissue samples were flashfrozen in liquid  
144 nitrogen, and then stored at -80°C until DNA extraction. At each step of this protocol,  
145 dissecting tools and bench surfaces were thoroughly cleaned in successive baths of 10 %  
146 bleach, demineralized water, and 95 % EtOH as to avoid DNA cross-contamination. Using  
147 this dataset, we checked that male mitochondria were limited to male gonads (*i.e.* absent from  
148 other male tissues and from females); thus making molecular sexing permissible (Le Cam et  
149 al in prep).

150 For the other sampling sites, whole individuals had been collected for a previous  
151 study (Becquet et al. 2012 and the BIOCOMBE project) and were preserved in 95% EtOH. A  
152 3 mm<sup>3</sup> piece of tissue was sampled from the gonad, gDNA was purified and quantified as  
153 detailed below, and PCR amplifications were attempted with both the *cox1m* and *cox1f*  
154 primers. Individuals for which both gene regions could be amplified were considered as  
155 males and included in subsequent analyses.

156

### 157 **Molecular Analyses**

158 Total DNA was extracted with the Nucleospin Tissue Kit (Macherey Nagel), following the  
159 manufacturer's instructions. In Saint-Vaast and Mont Saint Michel, most specimens were  
160 sexually undifferentiated at the time of sampling. Therefore, for these samples and for the  
161 samples from all the other "non-French" localities, sex was determined by checking for the  
162 amplification of both male and female *cox1* markers in gonad DNA. DNA purity and  
163 potential contaminants were checked using a NanoDrop2000.

164 Polymerase chain reaction (PCR) amplifications of the female (*cox1f*) and male  
165 (*cox1m*) mitochondrial DNA regions were performed using specific primers (Cox1m:  
166 *cox1m14641F* ATAGCTGGCCTGGTGTTTAGG, *cox1m15560R*

167 TTGGACCCTTTCGAGCCAAG; Cox1f: *cox1f5343F* TTAGTGACTTCACACGGTTTGC,  
168 *cox1f6032R* TGGGAAATAATCCCAAACCCG). Amplifications were realized in a total  
169 volume of 25  $\mu\text{L}$ , with 0.1  $\mu\text{L}$  of Taq Polymerase 5  $\text{U}\cdot\mu\text{L}^{-1}$  (TaKaRa Ex Taq® Kit  $\text{MgCl}_2$   
170 Free Buffer) (TaKaRa Ex Taq, TaKaRa Bio, Shiga, Japan), 2.5  $\mu\text{L}$  PCR Buffer 10X, 1.5  $\mu\text{L}$   
171  $\text{MgCl}_2$  25 mM, 1  $\mu\text{L}$  dNTP 2.5 mM each, 0.6  $\mu\text{L}$  each primer 10  $\mu\text{M}$  and 17.7 Milli-Q water,  
172 and 1 to 20 ng of template DNA. SensoQuest thermal cyclers (Göttingen, Germany) were  
173 used to perform the following PCR cycling profiles: (i) for the *cox1f*, 2 min of initial  
174 denaturation at 94°C, then 30 cycles consisting of 45 sec at 94°C followed by 30 sec of  
175 annealing at 57°C and 40 sec of elongation at 72°C, and a 5 min final step of elongation at  
176 72°C, and (ii) for the *cox1m*, 2 min at 94°C, then 30 cycles of 30 sec at 94°C, 30 sec at 60°C  
177 and 55 sec at 72°C, and a final elongation for 5 min at 72°C. PCR success (*i.e.* amplicon  
178 concentration, specificity and absence of amplicons for PCR and extraction negative  
179 controls), was tested on 1% agarose gels. PCR products were then sent to Eurofins GATC  
180 Biotech GmbH (Konstanz, Germany) to be purified and Sanger sequencing was performed on  
181 both directions.

## 182 **Sequence Analyses**

183 All sequences of *cox1f* sequences and *cox1m* fragments were quality-controlled and aligned  
184 in Geneious Prime 10.2.6 (Kearse et al 2012). Consensus sequences were trimmed to 479 bp  
185 and 676 bp for *cox1f* and *cox1m*, respectively. Full length *cox1m* (676 bp) was called *cox1m-*  
186 *long* hereon and trimmed *cox1m* sequences at the same length as *cox1f* (479bp) to compute  
187 further comparative analyses was referred to *cox1m* hereon.

188 Haplotype sequences and their frequencies from *cox1-long* computed in R v3.3.3 (R Core  
189 Team, 2017) using the *pegas* package v0.11. (Paradis, 2010) In order to model intraspecific  
190 relationships among haplotypes, for both *cox1f* and *cox1m-long*, median-joining networks  
191 (Bandelt et al., 1999) were constructed with PopART v1.7 software (Leigh & Bryant, 2015).

192 Genetic diversity indices and population differentiation analyses at *cox1f* and *cox1m*  
193 were estimated only for sampling sites with a minimum sample size of 10 individuals.  
194 Genetic diversity indices were calculated using Arlequin v3.5.2.2 (Excoffier et al., 1992):  
195 haplotype number (H), haplotype diversity ( $H_d$ ) and nucleotide diversity ( $\pi$  Tajima, 1983).  
196 Index distributions were statistically compared using paired non-parametric Mann-Whitney-  
197 Wilcoxon tests. Genetic differentiation was estimated in Arlequin using the  $F_{ST}$  fixation  
198 index and its statistical significance was tested by performing 10,000 permutations (Excoffier  
199 et al., 1992).

200 An analysis of molecular variance (AMOVA) was carried out to evaluate the genetic  
201 structure among geographic regions and overall sampling sites using 10,000 permutations  
202 with Arlequin v3.5.2.2 (Excoffier et al., 1992). We used jModeltest2 (Darriba et al., 2012;  
203 Guindon & Gascuel, 2003) to choose the Tamura-Nei model of nucleotide substitution (with  
204 gamma shape parameters of 0.1150 and 0.1450 for *coxI*f and *coxI*m respectively) as a  
205 measure of haplotype distances in Arlequin. Based on discordances in the distribution of the  
206 genetic diversity at *coxI*f and *coxI*m, several hierarchical groupings of subpopulations were  
207 tested for each marker to determine the best geographical delineation of genetic structure.

208 Different measures of populations differentiation (pairwise and AMOVA) were also  
209 carried out using conventional F- statistics.

210 To test for differences in selective pressure on the female and male mitochondrial sequence  
211 sets, the Tajima's D (Tajima, 1989) test for deviations from the neutral theory model for a  
212 population of constant size was calculated in Arlequin v3.5.2.2 (Excoffier et al., 1992) for  
213 each marker and sampling sites. Its statistical significance was tested with 10,000  
214 permutations. The McDonald and Kreitman test (McDonald and Kreitman 1991) was used to  
215 compare polymorphism and divergence among female and male mitotypes. The test was  
216 conducted in DNAsp (Librado and Rozas 2009) within genetically homogeneous groups at  
217 the north and south of the hybrid zone.

218 Because the difference in effective population size ( $N_e$ ) between males and females is often  
219 invoked in the literature as a factor influencing the population genetics of M- and F-  
220 mitogenomes, we estimated this parameter using three different methods: first, based on the  
221 method used in Ladoukakis et al (2002), the ratio of the male and female genome effective  
222 size  $N_e$  was estimated based on

223 (i) the expected effective number of alleles under neutrality formulated by Crow and  
224 Kimura (1970, equation 7.2.5)

$$225 \quad n_e = CN_e\mu + I \text{ (not } n_e = Cn_e\mu \text{ as written Ladoukakis et al 2002)}$$

226 C being variable according to the mutation model and the genome (mitochondrial vs  
227 nuclear). Conversely to Ladoukakis et al 2002, because we estimated a male mitogenome  
228 mutation rate ( $\mu_M$ ) twice as high as  $\mu_F$ , the mutation rate term was  $\mu$  was kept in the  
229 equation:

$$230 \quad \frac{N_{eF}}{N_{eM}} = \frac{n_{eF}-1}{n_{eM}-1} \times \frac{\mu_M}{\mu_F}$$

231 (ii) an estimate of  $n_e$  given by Zouros (1979, equation 15)

232 
$$n_e = \frac{1}{1-Hd}$$

233

234 This method solely relies on the estimate of haplotype diversity  $Hd$  and the mutation rate  $\mu$ .  
235 The marker-specific mutation rates were estimated together with the molecular clocks as  
236 described thereafter in the paragraph. Second,  $\pi_a/\pi_s$  was used as a proxy  $N_e$  since small  $N_e$   
237 are expected to exhibit a higher segregating mutation load (high  $\pi_a/\pi_s$ ) (Galtier and  
238 Rousselle 2020).

239 Last, we used Coalescent Bayesian Skylines to estimate differences in demographic  
240 history between the male and the female mitochondrial markers, both sampled from male  
241 individuals. This method is based on the tree topology, from which is extracted the rate of  
242 coalescent event and hence  $N_e$  (Drummond et al 2005). For this, we focused on a southern  
243 group composed of Arcachon, Fouras, Aytré and Saint Brévin, and on a northern group  
244 composed of Kruiningen, Crildumersiel, Wilhelmshaven and Sylt. In both case, populations  
245 are genetically homogeneous (Tables S2 and S3), unambiguously outside of the  
246 Finistère/Cotentin hybrid zone. Sample sizes were 102 and 42 males, respectively. First, we  
247 estimated a molecular clock for the male and female *cox1* gene by calculating the genetic  
248 distance among sequences of *L. balthica* and *Donax*, another Tellinoidea characterized by  
249 DUI (Theologidis et al 2008; Gusman et al 2016). For *L. balthica*, we used m and f  
250 haplotypes from Umea and Arcachon as extremes on the haplotypes networks (Fig 1). For  
251 *Donax*, we used GenBank records for *D. faba* (AB040843 and AB040844 for m and f *cox1*,  
252 respectively) and for *D. cuneatus* (AB040841 and AB040842 for m and f *cox1*, respectively).  
253 The mean genetic distance (Kimura 2-parameters distance, Kimura 1980) between all  
254 *Limecola / Donax* sequence pairs were used to calculate a marker-specific molecular clock,  
255 given a divergence time of 90 to 140 My between the two genera (as in Luttikhuisen et al  
256 2003, based on fossil dating in Pohlo 1982). To run the Bayesian skyline analysis, we  
257 followed the protocol of Müller and du Plessis (Barido-Sottani et al 2018). For each dataset  
258 (male and female) and for each extreme of the estimated molecular clocks, we ran BEAST  
259 v2.6.3 (Bouckaert et al 2019) using a GTR+G+I site model, a strict clock model, 800M  
260 generations with a pre-burnin of 80M generations. The number of dimensions (groups of  
261 coalescent events) was set to 3 after test runs with 3 to 5 dimensions. Other priors were left at  
262 their default values. Convergence was checked in Tracer v1.7.1.  $N_e$  estimates are presented



263 as median values for the retained runs for the low mutation rate, unless otherwise noted.  
264 Generation time for *L. balthica* is 2 yrs (Beukema et al 2001).

265

## 266 **Results**

267 A total of 666 individuals from 17 sampling sites of the French Atlantic coast were dissected  
268 and optical microscopy sexing reported 248 males, 185 females and 233 undifferentiated  
269 individuals. Undifferentiated specimens might have released their gametes or resorbed them,  
270 as lipid droplets were observed in some of the undifferentiated gonads. Molecular sexing was  
271 used to detect males in undifferentiated individuals.

272 Both *cox1m-long* and *cox1f* were successfully sequenced for 313 male individuals  
273 from 17 sampling sites (Table 1). Sampling size per site ranged from 2 to 33 overall sampling  
274 sites and from 28 to 33 when only considering sampling sites in France, apart from Arcachon  
275 (N=10). We used *cox1m-long* for haplotype networks (Fig 1) and haplotype geographical  
276 frequencies (Fig 2). All other analyses were performed on *cox1m* rather than *cox1m-long* to  
277 compare M and F markers in a strict, quantitative fashion.

278 Among the 313 studied individuals, 37 and 81 haplotypes were found for *cox1f* and  
279 *cox1m-long*, respectively. Among these, 57% were singletons at *cox1f* and 80% at *cox1m-*  
280 *long*. Median joining networks showed a similar geographical pattern with three main  
281 haplogroups encompassing mainly the northern, central and southern samples (Fig 1 A and  
282 C). A second *cox1m-long* central haplogroup (IIb) containing 6 haplotypes was observed and  
283 only found in the hybrid zone (MSM: Mont Saint Michel and BRI: Saint Brieuç).  
284 Nonetheless, the networks revealed important differences between markers. First, *cox1m-long*  
285 not only presented a higher diversity, but also a higher divergence level: a maximum of 24  
286 and 40 mutation steps separated the most divergent haplotypes for *cox1f* and *cox1m-long*,  
287 respectively. Haplotype networks and frequencies for the truncated *cox1m* dataset are  
288 presented in Fig S1 and revealed similar pattern of high diversity (64 haplotypes) and  
289 divergence (9 mutation steps were estimated between the main central haplotype and the  
290 northern one for *cox1f* against 18 for *cox1m*). We estimated divergence rates of 0.47 s/s and  
291 0.24 s/s for the m and f datasets, respectively. This difference is significant based on the  
292 relative-rates test (100% significant comparisons out of 2368  
293 <https://github.com/lly005/Relative-Rate-Test>). This resulted in molecular clocks of 0.0033  
294 and 0.0017 s/s/My for *cox1m* and *cox1f*, respectively, considering a 140My divergence

295 between *Limecola* and *Donax*; 0.0052 and 0.0027 s/s/My for *cox1m* and *cox1f*, respectively,  
296 considering a 90 My divergence between these taxa.

297 The relative frequencies of the haplogroups illustrated in Fig 2 showed different  
298 patterns. The *cox1m-long* haplogroup I was present only in Baltic and North Sea samples  
299 while the *cox1f* haplogroup I encompassed individuals from the Baltic Sea to the English  
300 Channel (hybrid zone). Also, the haplogroup II of *cox1f* was shared among the Baltic Sea,  
301 North Sea, the English Channel and Atlantic samples whereas the main central haplogroup  
302 (IIa) of *cox1m-long* was found only in the North Sea and the Channel Sea. Interestingly, clear  
303 genetic breaks were revealed for each marker and they were not located at the same  
304 geographical location. For the *cox1m-long*, the Cotentin peninsula represented a sharp  
305 transition zone between the haplogroups IIa and III which was confirmed by pairwise  $\Phi_{ST}$   
306 values (Table S2). Two homogenous populations were observed north of the Cotentin  
307 peninsula and the south of the Finistère (within group pairwise  $\Phi_{ST}$  ranged from -0.05 to  
308 0.04) and these populations were highly differentiated (between group pairwise  $\Phi_{ST}$  ranged  
309 from 0.38 to 0.61). In between, the BRI and MSM sampling sites were very differentiated  
310 (between group pairwise  $\Phi_{ST}$  ranged from 0.50 to 0.61) from the North of the Cotentin but  
311 they were also weakly yet significantly different from some sites at the South of the Finistère  
312 (between group pairwise  $\Phi_{ST}$  ranged from 0.02 to 0.04). For *cox1f*, the pattern was more  
313 complex. The haplogroup III was composed of haplotypes found in majority at the south of  
314 the Finistère (Fig 2) and samples from either side of the Finistère were highly divergent  
315 (pairwise  $\Phi_{ST}$  ranging from 0.41 to 0.79, Table S3). On both sides of the Finistère peninsula,  
316 significant population substructure was detectable: the Pont Mahé (MAH) sampling site was  
317 mildly differentiated from Saint Brévin (BRE) and Aytré (AYT) (pairwise  $\Phi_{ST}$  of 0.13 and  
318 0.08 respectively, table S3). Also, the relative frequency of the 3 haplogroups was variable in  
319 the north of the Finistère peninsula, resulting in a patchy distribution of the genetic diversity  
320 (Fig 2). Saint Briec (BRI) for instance was highly differentiated from all other northern sites  
321 except from MSM (Mont Saint Michel). Based on these results, genetically homogenous  
322 sampling sites were merged in 3 geographical groups presented in Table 1 and used in  
323 subsequent analysis (North, Center and South). The hybrid/Finistère group showed genetic  
324 differentiation only for *cox1m*.

325 Haplotypes from the extreme haplogroups were rarely shared within one individual  
326 (Fig1 B) and while 17 individuals exhibited the haplogroup I at *cox1f* and the haplogroup III  
327 at *cox1m*, no individual shared the *cox1f* haplogroup III and the *cox1m* haplogroup I. Also,  
328 only 4 individuals presented both the *cox1f* haplogroup III and the *cox1m* haplogroup IIa,

329 suggesting non-random mating or lethal haplotype combinations. Noteworthy, all these  
330 individuals were found in the hybrid zone sampling sites. These results were confirmed by  
331 the significant linkage disequilibrium test carried out among haplogroups for phased data  
332 (T<sub>2</sub> test df=6, p<0.001). The heatmap presented in Figure 3 illustrates the frequency of all  
333 the possible haplogroup associations and the associated correlation values.

334 The level of genetic diversity also differed between the two markers (Table 1). While  
335 the average nucleotide diversity ( $\pi$ ) and its range across sampling sites were similar (a mean  
336 value of 0.055 and a range of 0 to 0.0141 for *cox1f*; a mean of 0.0038 and a range 0.0004 to  
337 0.025 for *cox1m*), the median values of the nucleotide diversity (0.61 and 0.20 for *cox1f* and  
338 *cox1m* respectively) showed that the nucleotide diversity is significantly greater for *cox1f*  
339 than for *cox1m* (Wilcoxon rank test V= 65 p= 0.002). We observed the lowest nucleotide  
340 diversities in southern sampling sites for *cox1m* compared to *cox1f*. The haplotype diversity  
341 was not significantly different between the two markers (Wilcoxon rank test, V = 35, p =  
342 0.89) but the haplotype diversity showed a significant negative southward trend (a = -0.07,  
343 R<sup>2</sup>= 0.72) only for *cox1m*. Finally, Tajima's D also differed among the two markers. When  
344 considering the three geographical groups, significant negative values were found only for  
345 *cox1m* indicating the possibility of population expansion after a bottleneck event or selective  
346 sweep. For *cox1f*, on the other hand, no sign of deviation from neutral expectations was  
347 detected at the population level.

348 Consistently with the haplotype networks, the results of the AMOVAs suggested  
349 different geographic structuration patterns for *cox1m* and *cox1f* (Table 2). The best  
350 hierarchical model based on the F<sub>SC</sub>/F<sub>CT</sub> ratio (least variation within and highest between  
351 groups) was different for the two markers: for *cox1f* the best model was two groups separated  
352 by the Finistère peninsula (KRU, CRI, CRO, VAA, MSM, BRI vs MAH, BRE, AYT, FOU,  
353 ARC) whereas for *cox1m*, the best model was also two groups of subpopulation but with the  
354 Cotentin peninsula as a major geographical break (KRU, CRI, CRO, VAA) vs (MSM, BRI,  
355 MAH, BRE, AYT, FOU, ARC). The result of the AMOVAs (Table 2) showed similar level  
356 of among subpopulation genetic variation relative to the total variation for both markers  
357 (*cox1m*: 42% and  $\Phi_{ST}$ = 0.58, p<0.001; *cox1f*: 44% and  $\Phi_{ST}$ = 0.55, p<0.001). The level of  
358 differentiation among groups was higher for *cox1m* compared to *cox1f* ( $\Phi_{CT}$ = 0.57, p<0.001  
359 and  $\Phi_{CT}$ = 0.49, p<0.001 for *cox1m* and *cox1f* respectively). Finally, within group genetic  
360 structure is detected only for *cox1f* ( $\Phi_{SC}$ = 0.01, p=0.062 and  $\Phi_{SC}$ = 0.13, p<0.001 for *cox1m*

361 and *coxIf* respectively). Genetic differentiation analyses based only on haplotype frequencies  
362 (conventional F-statistics) were also carried out and gave similar results (not shown).

363 McDonald and Kreitman tests were carried out in two genetically homogeneous  
364 groups for both markers: “North” and “South” composed of individuals from KRU, SYL,  
365 WIL and CRI sampling sites and from AYT, ARC, BRE and FOU respectively (Table 3). In  
366 both groups, the MK tests revealed that the divergence between male- and female-type *coxI*  
367 gene showed a significant departure from neutral expectations with a large excess of fixed  
368 non-synonymous mutations (Table 3). Also, the very low  $\pi_a/\pi_s$  within each mitotype in both  
369 genetic groups showed that the two genes (*coxIm* and *coxIf*) are under strong purifying  
370 selection. Non-synonymous nucleotide diversity in *coxIm* was slightly higher than in *coxIf* in  
371 the North group and overall samples but not significantly, suggesting selection pressure  
372 acting on *coxI* gene was similar among mitotypes.

373 Two of the three methods used to infer effective population size converged to suggest  
374 that contemporary  $N_{eM}$  is higher than  $N_{eF}$  at northern sampling sites, while the opposite holds  
375 at southern sites (Zouros  $N_{eF}/N_{eM}$  ratio, Table 1; Bayesian Skyline Plot, Figure 4).  
376 Contemporary  $N_{eF}/N_{eM}$  calculated using Zouros’ method and BSP at time=0 were 0.91 and  
377 0.27 within the northern group and 5.09 and 1.07 within the southern group, respectively  
378 (0.13 and 1.09 for high mutation rates, Figure S2).  $\pi_a/\pi_s$  estimates, on the other hand, were  
379 always higher for *coxIm*, suggesting a smaller  $N_e$  for this marker compared to *coxIf*  
380 regardless of the group considered.

381 BSP further suggested that historical  $N_e$  dynamics differed between markers (Figure 4  
382 for the high mutation rate and figure S2 for the low mutation rate). Southern populations  
383 exhibited  $N_e$  ranging between 1 and 4.5 M individuals with similar median values (2.3 and  
384 2.5 M for *coxIm* and *coxIf*, respectively), with similar population growth that started about  
385 200,000 years ago for *coxIf* (about 122,000 years ago based on the fastest mutation rate).  
386 ESS values for the estimated parameters are excellent for the southern group (e.g. posterior  
387 ESS between 270 and 422). Northern M-type and F-type datasets exhibited significantly  
388 different patterns, with similar  $N_e$  for *coxIf* and *coxIm* prior to about 155,600 years ago  
389 (about 107,300 for the highest mutation rate), followed by an exponential  $N_e$  increase for  
390 *coxIm* only. ESS for the posterior were lower than for the southern group, but acceptable  
391 (110 to 154).

392

393 **Discussion**

394

395 Investigating genetic structure of the DUI species *Limecola balthica* across a hybrid  
396 zone in the English Channel revealed discordant phylogeographic patterns for the female- and  
397 male-type mitochondrial *cox1* gene. Because F- and M- mtDNA were compared among  
398 homologous regions within heteroplasmic males, variability can be strictly attributed to  
399 heredity rather than inter-individual or inter-genic differences. This variability resides in (1) a  
400 latitudinal gradient in haplotypic diversity for *cox1m* but not *cox1f*, (2) sharper deviation from  
401 neutral expectations of nucleotide diversity levels for *cox1m* relative to *cox1f* that can be  
402 attributed to historical demographic changes and / or relaxed purifying selection at the former  
403 locus, and (3) discordant geographic clines for M- and F- mtDNAs. Below we discuss these  
404 differences considering neutral and selective processes that may have caused them.

405

#### 406 **Genetic diversity: differential latitudinal variation between m and f genes**

407 Male-type mtDNA was almost up to twice as polymorphic as its female counterpart,  
408 with more haplotypes, more haplotypes represented by a single male and more segregating  
409 sites. Higher polymorphism in the M-type mtDNA, both within and between species  
410 (Skibinski et al 1999), is a common feature among DUI species, as reported in *Polittapes*  
411 *rhombooides* (Chacon et al 2020), *Pyganodon grandis* (Krebs 2004) and *Mytilus sp.* (Ort and  
412 Pogson 2003; Smietanka et al 2009, 2013, 2017). Higher frequency of rare M-type  
413 haplotypes (80% of singletons compared to 57% among F-type haplotypes in *L. balthica*) is  
414 another largely shared feature among DUI species (Chacon et al 2020, Ort & Pogson 2007,  
415 Smietanka et al 2009, 2013, 2017). Major determinants of genetic diversity in animals are  
416 linked selection, mutation and effective population size (Ellegren and Galtier 2016). In DUI  
417 bivalves, polymorphism might result from different selection pressures on male- and female-  
418 type mitogenomes (e.g. Milani et al 2012): female-type mitochondria ensure proper  
419 mitochondrial function at the scale of the individual whereas male-type mitochondria, which  
420 solely co-occurs in heteroplasmic individuals with the F-type mitochondria (Skibinski et al  
421 1994 and Zouros et al. 1994) have to effectively function exclusively in the male germ line  
422 and gametes (different ‘arenas of selection’ *sensu* Stewart et al 1996). According to the male-  
423 driven evolution hypothesis, higher germ cell divisions in males (Shimmin et al 1993) could  
424 result in an enhanced replication rate of the M-type mitochondria during spermatogenesis,  
425 providing more opportunities for mutations to accumulate (Rawson and Hilbish 1995 and  
426 Stewart et al 1995). In addition, oxidative damage might be important in sperm (Zouros  
427 2013), and/or selection pressures on chaperonins and DNA repair genes might be relaxed. We

428 can also expect sex-linked demographic differences to influence polymorphism, if the  
429 effective population size differs between males and females; this is supported by our dataset  
430 to a large extent at historical (*e.g.* past expansion inferred for *cox1m* in the north) and  
431 contemporary time scales. Most hypotheses on the role of selection, mutation and effective  
432 population size in shaping genetic diversity in DUI bivalves remain to be empirically tested.

433 However, counter examples do exist. For instance, Beauchamp et al (2020) found  
434 more F-type haplotypes than M-type haplotypes in *Pyganodon grandis* (11 and 7,  
435 respectively) and *P. lacustris* (20 and 6, respectively). Smietanka et al 2013 (87 F- and 76 M-  
436 type haplotypes in *Mytilus trossulus*) and Riginos et al 2004 (132 F- and 56 M-type  
437 haplotypes in *Mytilus edulis*) reported the same pattern, although the latter results might be  
438 due to the difficulty of amplifying the male-type mtDNA.

439

440 Although often presented as such in the literature, higher polymorphism in males is  
441 therefore not a universal feature of the population genetics of DUI species. When genetic  
442 diversity was measured using nucleotide diversity  $\pi$ , the two markers differed significantly  
443 along the geographical area sampled with a significant positive trend observed between  $\pi$  and  
444 latitude at the M-type marker. While it varied between sites,  $\pi$  at *cox1f* displayed no  
445 geographic pattern.

446 Estimating  $\pi$  at *cox1f*, regardless of individual sexes, Becquet et al (2012) found that  
447 Southern populations, near the species range limit (brought here to Arcachon Basin), were  
448 more diverse than northern populations both at mitochondrial and nuclear markers. This  
449 pattern was attributed to phylogeography, the Bay of Biscay being a glacial refugium for  
450 other species (*eg.* Hewitt 1999; Gomez and Lunt 2007). Contrasting diversity patterns  
451 between F-type and M-type mtDNA observed in the present study bear similarities with  
452 predictions of population characteristics at the border of the species range (Holt et al 2003,  
453 reviewed in Dawson et al 2010). Predictions associated with the hypothesis of genetic  
454 impoverishment (H1: few northern migrants enter southern peripheral populations) are  
455 mostly met at *cox1m*, while the migration load hypothesis (H2: northern migrants bear alleles  
456 that are maladaptive in southern environments) seems to better fit the *cox1f* dataset. Gene  
457 flow between populations towards the range limit should be lower under H1 and higher under  
458 H2. While populations across the Cotentin were more differentiated at *cox1m* than  
459 populations across the Finistère at *cox1f*, Pairwise  $\Phi_{ST}$  were higher between southern  
460 populations at *cox1f* than *cox1m*. Genetic diversity should be low (decreasing toward the

461 range limit) under H1 and high under H2, which is met for *cox1m* and *cox1f*, respectively.  
462 These patterns support the hypothesis that different selection pressures act on M-type and F-  
463 type mt genes, and therefore on male gametes vs. male adults and female at all life stages.  
464 This seems plausible (and testable) if we consider that genetic impoverishment occurs at  
465 early life stages in males (gamete and/or early zygote survival) and migration load occurs at  
466 all stages, such as was previously hypothesized for mitochondrial function (Pante et al 2012,  
467 2019).

468

#### 469 **Discordance of geographic breaks between sex-specific mitogenomes**

470 Both male and female mtDNAs displayed significant segregation of haplotypes in  
471 space. As previously described by Becquet et al (2012), southern populations were  
472 significantly differentiated from northern ones based on *cox1f*, and a geographical break  
473 between these two groups was observed at the Finistère peninsula. Sampling done for the  
474 present study narrows the gap between northern and southern populations by about 50 km  
475 thanks to the addition of the site of Saint Brieuc Bay, however we failed at sampling any  
476 large population between the latter and Pont Mahé, south of Finistère (Fig 2). While  
477 anecdotal data support the presence of *L. balthica* near Brest (on the banks of Le Faou River;  
478 Hily 2013), we speculate based on field observations (Becquet et al 2012, Le Mao et al 2020  
479 and this study) that the Finistère intertidal seem largely inhospitable to this species due to the  
480 scarcity of mud flats. It therefore appears as a credible physical barrier to genetic  
481 connectivity, and it has been indeed identified in the past as a genetic transition zone for other  
482 marine benthic-pelagic species confined to estuaries and bays (muddy-fine sediment species  
483 Jolly et al 2005, 2006).

484 Likewise, *cox1m* haplotypes strongly segregated in space, separating southern and  
485 northern populations at the Cotentin peninsula. This peninsula is located about 50 km farther  
486 East of the Finistère peninsula. As for the Finistère, sandy mud flats hospitable to *L. balthica*  
487 are scarce, and our field surveys failed at identifying populations between Mont-Saint-Michel  
488 Bay and Saint Vaast, although anecdotal presence of the species was recorded farther along  
489 the Cotentin coast and was reported to be present but rare on the Normand-Breton Gulf (Le  
490 Mao et al 2020). Along with the scarcity of seemingly appropriate habitat and patchiness of  
491 small populations in the intertidal zone of Cotentin, we observed significant differences in  
492 gonadal development and spawning phenology between populations on either side of the  
493 peninsula. While individuals with full gonads and well-developed gametes were sampled  
494 between the 4th and the 23rd of April 2018 from Fouras to Mont Saint-Michel Bay (some

495 individuals having even spawned in the field at MSM and Saint Brieuç), gonads from Saint  
496 Vaast and Somme Bay individuals were still in early stages of development by April 19, 2018  
497 (most gametes being still undifferentiated). These observations were on par with previous  
498 reports suggesting spawning asynchrony across the Cotentin Peninsula, with spawning  
499 occurring in early April in Aytré (Saunier 2015) and August in Somme Bay (Ruellet 2013).  
500 In the great scallop, *Pecten maximus*, different spawning phenologies were described across  
501 the Cotentin peninsula (Lubet et al 1995). As for the Finistère, the Cotentin Peninsula was  
502 previously identified as a barrier to gene flow (Jolly et al 2005, Quéméré et al 2016, Handal  
503 et al 2020). It is also the southern biogeographical boundary of the northern cold temperate  
504 Boreal region (Dinter 2001) with distinct hydrologic and oceanographic features from the  
505 western part of the English Channel (Dauvin 2012)

506

507         There are, therefore, multiple exogenous (habitat availability; oceanographic currents,  
508 *e.g.* Hily 2013, Dupont et al 2007, Fievet et al 2007) and endogenous (asynchrony in  
509 reproductive phenology and genetic incompatibilities, discussed below) barriers that could  
510 contribute to the genetic differentiation of populations across these two peninsulas. Whether  
511 these breaks are involved in primary intergradation or secondary contact (by geographically  
512 stabilizing endogenous genetic barriers; Bierne et al 2011) remains to be answered (we  
513 attempted to test scenario of isolation with migration using the present dataset without  
514 success). We can nevertheless note that divergence of populations on either side of the  
515 Finistère-Cotentin break occurred between 0.11 to 2.6 Myr ago (Luttikhuisen et al 2003),  
516 while population expansion on either side of the break took place 107 to 200 k years ago  
517 (depending on the marker and on the clock; table 1, Figures 4, S2). We can therefore  
518 tentatively speculate that these populations diverged during the penultimate glacial maximum  
519 occurring in the NE Atlantic 140,000 years ago (Martin-Garcia 2019) and expanded with  
520 secondary contact after that event.

521         The fact that each of these barriers is sex-specific is quite original for a marine  
522 invertebrate. In the DUI literature, studies have reported that genetic differentiation across  
523 populations is stronger for M-type mtDNA than for F-type mtDNA (Liu et al 1996, Skibinski  
524 et al 1999, Riginos et al 2004), and some authors reported discordant genetic structure  
525 between markers. The freshwater mussels *Lampsilis siliquoidea* displayed population genetic  
526 structure at *cox1f* but none at *cox1m* (Krebs et al 2013). Conversely, Riginos et al (2004)  
527 found weak connectivity at F-type mtDNA but none at M-type mtDNA in *Mytilus edulis*  
528 across the Atlantic Ocean. At the entrance of the Baltic, rampant introgression of *M. edulis* F-



529 type mtDNA was observed, compared to a sharp cline at M-type mtDNA concordant with  
530 M7 lysin (a nuclear gene involved in fertilization; Stukas et al 2009). This makes the  
531 population structure described here for *L. balthica* noteworthy in the sense that the  
532 phylogeography of F- and M-type mt markers do not simply differ in amplitude or resolution  
533 (due to significant differences in mutation rates,  $\mu_M$  being about twice  $\mu_F$ ) but differ in the  
534 geographical position of the haplotypic cline separating southern and northern *L. balthica*  
535 *rubra*.

536 While a genetic break located around the Finistère peninsula corresponds to previous  
537 results by Becquet et al (2012) for *cox1f* and eight nuclear microsatellites, the Cotentin was  
538 not detected as a barrier in that study. However, spatial structure was detected at the nuclear  
539 *atp5c1* gene (encoding the gamma subunit of the FO/F1 ATP synthase protein complex)  
540 between Mont-Saint-Michel and Somme Bay (Saunier 2015). Non-synonymous point  
541 mutations separating southern and northern populations are located in an inter-peptide  
542 interaction domain of the gamma subunit, suggesting mito-nuclear incompatibilities (Pante et  
543 al 2019). The concordance of *atp5c1* and *cox1m* call for further investigation of  
544 incompatibilities involving the male mitogenome specifically.

545 Interestingly, significant differentiation with *cox1f* was detected between Pont Mahé  
546 (MAH) and the Saint Brévin (BRE) and Ayré (AYT) populations (Table S3). These two  
547 groups, separated by the Vilaine River, were identified as significantly differentiated based  
548 on microsatellites, but not *cox1f* in the study of Becquet et al (2012), which was based on  
549 individuals from both sexes, while our study focused on males exclusively. We may therefore  
550 benefit from higher statistical power to detect differences in differentiation across the Vilaine  
551 River. This implies that genetic structure among males at *cox1f* is higher than in females.  
552 Although we did not include females in our study, we did compare pairwise  $\phi_{ST}$  values  
553 between sampling sites that were common between our study and Becquet's.  $F_{ST}$  and  $\phi_{ST}$   
554 were both significantly higher in the dataset composed of males exclusively, compared to the  
555 dataset composed of males and females (Figure 5). This pattern can be attributed to stochastic  
556 genetic variation (effects of mutations and drift) and/or differences of gene flow between  
557 sexes. The geographical discordance observed at the Finistère and Cotentin peninsulas for  
558 *cox1f* and *cox1m* are also reminiscent of sex-level differences. Indeed, in studies using  
559 female-transmitted mtDNA and male-transmitted Y chromosome to investigate population  
560 structure, sex-biased asymmetries are often cited as a determinant of discordant geographic  
561 patterns (e.g. Boissinot et al 1997, Trejo-Salazar et al 2021). Sex-level differences in gene  
562 flow are scarcely reported but exist in bivalves, as in the protandrous pearl oyster *Pinctada*

563 *mazatlanica*, which effective sex-ratio is strongly biased towards males (Arnaud-Haond et al  
564 2003).

565 Interestingly, the *cox1m* IIb haplogroup, branching from the southern haplogroup III,  
566 is private to the two populations sampled between Finistère and Cotentin (Saint Brieuc and  
567 Mont-Saint-Michel; Figs 1-2). This suggests genetic isolation of these populations and  
568 subsequent retention of these private haplotypes in the Gulf. This pattern supports a  
569 (re)colonization scenario from the south to the Gulf (fitting “concordant” simulated networks  
570 for colonization from a refugium; Maggs et al 2008). An alternative scenario, unsupported by  
571 the genetic diversity observed in the south, is a stepwise colonization of the south from the  
572 north and the loss of IIb haplotypes in the south either from drift or selection.

573 Other factors could explain the M- vs. F-mtDNA discordance, such as mtDNA  
574 introgression and heterogeneity in its rate, hybrid zone movement and drift (Barton and  
575 Hewitt 1985, Bierne et al 2003, Toews et al 2012). Patterns of asymmetric introgression of  
576 alleles are commonly observed in hybrid zones (Barton and Hewitt 1985) and were observed  
577 in the Bay of Biscay between *Mytilus edulis* and *M. galloprovincialis* (Rawson and Hilbish  
578 1998). In *L. balthica*, asymmetrical gene flow from North to South was detected at *cox1f*  
579 (Becquet et al 2012, this study), and *atp5c1* (Saunier 2015, Pante et al 2019). At that same  
580 locus, Gagnaire et al (2012), looking at divergence and selection among populations of the  
581 eels *Anguilla rostrata* and *A. anguilla* (two hybridizing sister species) also found evidence of  
582 unidirectional introgression from the former to the later. At *cox1m*, little introgression was  
583 detectable in *L. balthica*, but nevertheless sensibly higher from north to south.

584 Hybrid zone movement has been recognized for long, as a manifestation of variation  
585 in population density, dispersal rate, individual fitness, effects of allele frequencies on  
586 population structure, and spatially- or frequency-dependent selection (Barton and Hewitt  
587 1985). It has been proposed that the northeastern Atlantic *Mytilus* hybrid zones move parallel  
588 to warming sea surface temperatures (Hilbish et al 2012). While a similar phenomenon may  
589 occur in Baltic tellins, suggesting that genotype-environment correlations could affect cline  
590 geography (Ducos et al unpublished), neutral forces may be sufficient to result in discordant  
591 M-type and F-type mtDNA cline centers and width. Indeed, as detailed above, both the  
592 Finistère and the Cotentin peninsulas are characterized by low population densities and  
593 oceanic currents disrupting along-coast dispersal. While mitochondrial recombination is  
594 expected to be rare (or at least, rarely transmitted to offspring; Passamonti et al 2003),  
595 looking at whole mitogenomes as well as nuclear genes of mitochondrial function vs. other

596 (putatively neutral) nuclear markers may help shed light on the degree to which the patterns  
597 detected at *cox1* and *atp5c1* depart from neutral expectations.

598

599 Whether the asymmetric, discordant clines in *L. balthica* observed here are due to  
600 cline movement, differential gene flow, population structure, or selection (Barton and Hewitt  
601 1985) remains a fascinating avenue for future research. In particular, introgression across the  
602 hybrid zone in the English Channel calls for a test of asymmetric fitness of inter-lineage  
603 crosses (e.g., Turelli et al 2007). An involvement of mito-nuclear incompatibilities could  
604 explain the observed asymmetric allele frequencies if northern hybrids with southern  
605 mitochondria are less fit than southern hybrids with northern mitochondria.

606

## 607 **Data Accessibility**

608 *Cox1f* and *cox1-long* sequences were submitted to Genbank (accession N° OM855617 -  
609 OM855929 and OM856027 - OM856339 respectively). Rcode is available at  
610 [https://github.com/SabLeCam/Cox1\\_DUI](https://github.com/SabLeCam/Cox1_DUI).

611

## 612 **Acknowledgements**

613

614 The authors thank Mélanie Rocroy, Patrick Triplet, Thierry Ruellet, Rolet Céline  
615 (Association GEMEL, Picardie), Anthony STURBOIS (RNN Baie de Saint-Brieuc,  
616 VivArmor Nature) and Xavier de Montaudouin (Station Marine d'Arcachon, UMR 5805  
617 EPOC, Université de Bordeaux/CNRS) for their help with sample collection. This work was  
618 funded by the ANR (DRIVE project, grant n. ANR-18-CE02-0004-01) and by the contrat de  
619 plan Etat-Région (CPER/FEDER) ECONAT (RPC DYPOMAR). We thank the participants  
620 of the Biocombe project (“The impact of BIODiversity changes in COastal Marine Benthic  
621 Ecosystems;” contract n. EVK3-CT-2002-00072; Research n. OND1290723). Lab work was  
622 performed at the Molecular Core Facility at the University of La Rochelle. We thank the  
623 bioinformatics platform Toulouse Midi-Pyrénées (Bioinfo GenoToul).

624

625 **References**

626

- 627 [1] S. Arnaud-Haond, M. Monteforte, F. Blanc, and F. Bonhomme. Evidence for male-biased  
628 effective sex ratio and recent step-by-step colonization in the bivalve *Pinctada*  
629 *mazatlanica*. *Journal of Evolutionary Biology*, 16(5):790–796, 2003.
- 630 [2] H. Bandelt, P. Forster, and A. Rohlf. Median-joining networks for inferring intraspecific  
631 phylogenies. *Molecular Biology and Evolution*, 16:37–48, 1999.
- 632 [3] A. Barberousse, N. Bierne, J. Britton-Davidian, P. Cappy, Y. Desdevises, T. Giraud, E.  
633 Joussetin, C. Moulia, V. Ravigné, C. Smadja, and S. Samadi. Chapitre 4. La spéciation  
634 (dir. Ravigné, V). In F. Thomas, T. Lefevre, and M. Raymond, editors, *Biologie*  
635 *Evolutionne*. De Boeck Supérieur, 2010.
- 636 [4] J. Barido-Sottani, V. Boskov a, L. du Plessis, D. Ku hner, C. Magnus, V. Mitov, N. F.  
637 Müller, J. Pecerska, D. A. Rasmussen, C. Zhang, A. J. Drummond, T. A. Heath, O. G.  
638 Pybus, T. G. Vaughan, and T. Stadler. Taming the BEAST – A community teaching  
639 material resource for BEAST 2. *Systematic Biology*, 67(1):170–174, 2018.
- 640 [5] N. Barton and G. Hewitt. Analysis of hybrid zones. *Annual Review of Ecology and*  
641 *Systematics*, 16:113– 148, 1985.
- 642 [6] K. C. Beauchamp, T. W. Beyett, M. W. Scott, and D. T. Zanatta. Detection of hybrid  
643 *Pyganodon grandis* and *P. lacustris* (Bivalvia: Unionidae) using F-and M-type  
644 mitochondrial DNA sequences and geometric morphometrics. *Journal of Molluscan*  
645 *Studies*, 86(3):233–239, 2020.
- 646 [7] V. Becquet, B. Simon-Bouhet, E. Pante, H. Hummel, and P. Garcia. Glacial refugium  
647 versus range limit: conservation genetics of *Macoma balthica*, a key species in the Bay  
648 of Biscay (France). *Journal of Experimental Marine Biology and Ecology*, 432:73–82,  
649 2012.
- 650 [8] J. J. Beukema, J. Drent, and P. J. C. Honkoop. Maximizing lifetime egg production in a  
651 Wadden Sea population of the tellinid bivalve *Macoma balthica*: a trade-off between  
652 immediate and future reproductive outputs. *Marine Ecology Progress Series*, 209(119-  
653 129), 2001.
- 654 [9] N. Bierne, P. Borsa, C. Daguin, D. Jollivet, F. Viard, F. Bonhomme, and P. David.  
655 Introgression patterns in the mosaic hybrid zone between *Mytilus edulis* and *M.*  
656 *galloprovincialis*. *Molecular Ecology*, 12:447–461, 2003.

- 657 [10] N. Bierne, J. Welch, E. Loire, F. Bonhomme, and P. David. The coupling hypothesis:  
658 why genome scans may fail to map local adaptation genes. *Molecular Ecology*, 20:2044–  
659 2072, 2011.
- 660 [11] S. Boissinot and P. Boursot. Discordant phylogeographic patterns between the Y  
661 chromosome and mitochondrial DNA in the house mouse: selection on the Y  
662 chromosome? *Genetics*, 146(3):1019–1034, 1997.
- 663 [12] R. Bouckaert, T. G. Vaughan, J. Barido-Sottani, S. Duchêne, M. Fourment, A.  
664 Gavryushkina, J. Heled, G. Jones, D. Kuhnert, N. D. Maio, M. Matschiner, F. K.  
665 Mendes, N. F. Müller, H. A. Ogilvie, L. du Plessis, A. Popinga, A. Rambaut, D.  
666 Rasmussen, I. Siveroni, M. A. Suchard, C.-H. Wu, D. Xie, C. Zhang, T. Stadler, and A.  
667 J. Drummond. BEAST 2.5: An advanced software platform for Bayesian evolutionary  
668 analysis. *PLOS Computational Biology*, 15(4):e1006650, 2019.
- 669 [13] S. Breton, H. D. Beaupre, D. T. Stewart, W. R. Hoeh, and P. U. Blier. The unusual  
670 system of doubly uniparental inheritance of mtDNA: isn't one enough? *Trends in*  
671 *Genetics*, 23(9):465–474, 2007.
- 672 [14] S. Breton, D. T. Stewart, S. Shepardson, R. J. Trdan, A. E. Bogan, E. G. Chapman, A. J.  
673 Ruminas, H. Piontkivska, and W. R. Hoeh. Novel Protein Genes in Animal mtDNA: A  
674 New Sex Determination System in Freshwater Mussels (Bivalvia: Unionoida)?  
675 *Molecular Biology and Evolution*, 28(5):1645–1659, 2011.
- 676 [15] R. S. Burton and F. S. Barreto. A disproportionate role for mtDNA in Dobzhansky–  
677 Muller incompatibilities? *Molecular Ecology*, 21(20):4942–4957, 2012.
- 678 [16] R. S. Burton, R. J. Pereira, and F. S. Barreto. Cytonuclear genomic interactions and  
679 hybrid breakdown. *Annual Review of Ecology, Evolution, and Systematics*, 44:281–302,  
680 2013.
- 681 [17] C. Capt, S. Renaut, F. Ghiselli, L. Milani, N. A. Johnson, B. E. Sietman, D. T. Stewart,  
682 and S. Breton. Deciphering the Link between Doubly Uniparental Inheritance of mtDNA  
683 and Sex Determination in Bivalves: Clues from Comparative Transcriptomics. *Genome*  
684 *Biology and Evolution*, 10(2):577–590, 2018.
- 685 [18] C. Capt, S. Renaut, D. T. Stewart, N. A. Johnson, and S. Breton. Putative mitochondrial  
686 sex determination in the Bivalvia: insights from a hybrid transcriptome assembly in  
687 freshwater mussels. *Frontiers in genetics*, 10:840, 2019.
- 688 [19] G. M. Chacón, A. Arias-Pérez, R. Freire, L. Martínez, S. Nòvoa, H. Naveira, and A.  
689 Insua. Evidence of doubly uniparental inheritance of the mitochondrial DNA in  
690 *Polittapes rhomboides* (Bivalvia, Veneridae): Evolutionary and population genetic

- 691 analysis of F and M mitotypes. *Journal of Zoological Systematics and Evolutionary*  
692 *Research*, 58(2):541–560, 2020.
- 693 [20] J. F. Crow. An introduction to population genetics theory. Scientific Publishers, 2017.
- 694 [21] D. Darriba, G. Taboada, R. Doallo, and D. Posada. jModelTest 2: more models, new  
695 heuristics and parallel computing. *Nature Methods*, 9(8):772, 2012.
- 696 [22] J.-C. Dauvin. Are the eastern and western basins of the English Channel two separate  
697 ecosystems? *Marine Pollution Bulletin*, 64(3):463–471, 2012.
- 698 [23] M. N. Dawson, R. K. Grosberg, Y. E. Stuart, and E. Sanford. Population genetic analysis  
699 of a recent range expansion: mechanisms regulating the poleward range limit in the  
700 volcano barnacle *Tetraclita rubescens*. *Molecular ecology*, 19(8):1585–1605, 2010.
- 701 [24] W. P. Dinter. Biogeography of the OSPAR maritime area. Bonn, Germany: Federal  
702 Agency for Nature Conservation, 167, 2001.
- 703 [25] A. J. Drummond, A. Rambaut, B. Shapiro, and O. G. Pybus. Bayesian Coalescent  
704 Inference of Past Population Dynamics from Molecular Sequences. *Molecular Biology*  
705 *and Evolution*, 22(5):1185–1192, 2005.
- 706 [26] L. Dupont, C. Ellien, and F. Viard. Limits to gene flow in the slipper limpet *Crepidula*  
707 *fornicata* as revealed by microsatellite data and a larval dispersal model. *Marine Ecology*  
708 *Progress Series*, 349:125– 138, 2007.
- 709 [27] H. Ellegren and N. Galtier. Determinants of genetic diversity. *Nature Reviews Genetics*,  
710 17(7):422–433, 2016.
- 711 [28] L. Excoffier, P. E. Smouse, and J. M. Quattro. Analysis of molecular variance inferred  
712 from metric distances among DNA haplotypes: application to human mitochondrial  
713 DNA restriction data. *Genetics*, 131:479–491, 1992.
- 714 [29] V. Fievet, P. Touzet, J.-F. Arnaud, and J. Cuguen. Spatial analysis of nuclear and  
715 cytoplasmic DNA diversity in wild sea beet (*Beta vulgaris ssp. maritima*) populations:  
716 do marine currents shape the genetic structure? *Molecular Ecology*, 16(9):1847–1864,  
717 2007.
- 718 [30] P.-A. Gagnaire, E. Normandeau, and L. Bernatchez. Comparative genomics reveals  
719 adaptive protein evolution and a possible cytonuclear incompatibility between European  
720 and American eels. *Molecular Biology and Evolution*, 29(10):2909–2919, 2012.
- 721 [31] N. Galtier and M. Rousselle. How much does  $N_e$  vary among species? *Genetics*,  
722 216(2):559–572, 2020.

- 723 [32] A. Gómez and D. H. Lunt. Refugia within refugia: patterns of phylogeographic  
724 concordance in the Iberian Peninsula. In *Phylogeography of southern European refugia*,  
725 pages 155–188. Springer, 2007.
- 726 [33] D. Guerra, F. Plazzi, D. T. Stewart, A. E. Bogan, W. R. Hoeh, and S. Breton. Evolution  
727 of sex-dependent mtDNA transmission in freshwater mussels (Bivalvia: Unionida).  
728 *Scientific Reports*, 7(1):1–13, 2017.
- 729 [34] S. Guindon and O. A. Gascuel. A simple, fast, and accurate algorithm to estimate large  
730 phylogenies by maximum likelihood. *Systematic Biology*, 52(5):696–704, 2003.
- 731 [35] A. Gusman, S. Lecomte, D. T. Stewart, M. Passamonti, and S. Breton. Pursuing the  
732 quest for better understanding the taxonomic distribution of the system of doubly  
733 uniparental inheritance of mtDNA. *PeerJ*, 4:e2760, 2016.
- 734 [36] W. Handal, C. Szostek, N. Hold, M. Andrello, E. Thiébaud, E. Harney, G. Lefebvre, E.  
735 Borcier, A. Jolivet, A. Nicolle, A. Boyé, E. Foucher, P. Boudry, and G. Charrier. New  
736 insights on the population genetic structure of the great scallop (*Pecten maximus*) in the  
737 English Channel, coupling microsatellite data and demogenetic simulations. *Aquatic*  
738 *Conservation: Marine and Freshwater Ecosystems*, 30(10):1841–1853, 2020.
- 739 [37] G. M. Hewitt. Post-glacial re-colonization of european biota. *Biological journal of the*  
740 *Linnean Society*, 68(1-2):87–112, 1999.
- 741 [38] T. J. Hilbish, F. P. Lima, P. M. Brannock, E. K. Fly, R. L. Rognstad, and D. S. Wethey.  
742 Change and stasis in marine hybrid zones in response to climate warming. *Journal of*  
743 *Biogeography*, 39(4):676–687, 2012.
- 744 [39] C. Hily. Redécouverte de *Macoma balthica* (Linnaeus, 1758) en rade de Brest. *An aod -*  
745 *les cahiers naturalistes de l’Observatoire marin*, 2(1):31–35, 2013.
- 746 [40] R. D. Holt. On the evolutionary ecology of species’ ranges. *Evolutionary ecology*  
747 *research*, 5(2):159–178, 2003.
- 748 [41] M. Huber. *Compendium of bivalves. A full-color guide to 3,300 of the world’s marine*  
749 *bivalves. A status on Bivalvia after 250 years of research, volume 1.* ConchBooks,  
750 Harxheim, 2010.
- 751 [42] M. Huber. *Compendium of bivalves. A full-color guide to the remaining seven families.*  
752 *A systematic listing of 8’500 bivalve species and 10’500 synonyms, volume 2.*  
753 ConchBooks, Harxheim, 2015.
- 754 [43] H. Hummel, R. Bogaards, T. Bek, L. Polishchuk, C. Amiard-Triquet, G. Bachelet, M.  
755 Desprez, P. Strelkov, A. Sukhotin, A. Naumov, S. Dahle, S. Denisenko, M. Gantsevich,  
756 K. Sokolov, and L. de Wolf. Sensitivity to stress in the bivalve *Macoma balthica* from

- 757 the most northern (Arctic) to the most southern (French) populations: low sensitivity in  
758 Arctic populations because of genetic adaptations? *Hydrobiologia*, 355:127–138, 1997.
- 759 [44] M. T. Jolly, D. Jollivet, F. Gentil, E. Thiébaud, and F. Viard. Sharp genetic break  
760 between Atlantic and English Channel populations of the polychaete *pectinaria koreni*,  
761 along the north coast of France. *Heredity*, 94(1):23–32, 2005.
- 762 [45] M. T. Jolly, F. Viard, F. Gentil, E. Thiébaud, and D. Jollivet. Comparative  
763 phylogeography of two coastal polychaete tubeworms in the Northeast Atlantic supports  
764 shared history and vicariant events. *Molecular Ecology*, 15(7):1841–1855, 2006.
- 765 [46] M. Kearse, R. Moir, A. Wilson, S. Stones-Havas, M. Cheung, S. Sturrock, S. Buxton, A.  
766 Cooper, S. Markowitz, C. Duran, T. Thierer, B. Ashton, P. Meintjes, and A. Drummond.  
767 Geneious Basic: an integrated and extendable desktop software platform for the  
768 organization and analysis of sequence data. *Bioinformatics*, 28(12):1647–1649, 2012.
- 769 [47] M. Kimura. A simple method for estimating evolutionary rate of base substitutions  
770 through comparative studies of nucleotide sequences. *Journal of Molecular Evolution*,  
771 16:111–120, 1980.
- 772 [48] R. Krebs. Combining paternally and maternally inherited mitochondrial DNA for  
773 analysis of population structure in mussels. *Molecular Ecology*, 13:1701–1705, 2004.
- 774 [49] R. Krebs, W. Borden, N. Evans, and F. Doerder. Differences in population structure  
775 estimated within maternally- and paternally-inherited forms of mitochondria in *Lampsilis*  
776 *siliquoidea* (Bivalvia: Union-idae). *Biological Journal of the Linnean Society*, 109:229–  
777 240, 2013.
- 778 [50] E. Ladoukakis, C. Saavedra, A. Magoulas, and E. Zouros. Mitochondrial DNA variation  
779 in a species with two mitochondrial genomes: the case of *Mytilus galloprovincialis* from  
780 the Atlantic, the Mediterranean and the Black Sea. *Molecular Ecology*, 11:755–769,  
781 2002.
- 782 [51] P. Le Mao, L. Godet, J. Fournier, N. Desroy, F. Gentil, and E. Thiébaud. Mollusques. In  
783 E. de la Station biologique de Roscoff, editor, *Atlas de la faune marine invertébrée du*  
784 *golfe Normano-Breton*, volume 3/7, 2020.
- 785 [52] J. Leigh and D. Bryant. PopART: Full-feature software for haplotype network  
786 construction. *Methods in Ecology and Evolution*, 6(9):1110–1116, 2015.
- 787 [53] P. Librado and J. Rozas. DnaSP v5: A software for comprehensive analysis of DNA  
788 polymorphism data. *Bioinformatics*, 25:1451–1452, 2009.



- 789 [54] H.-P. Liu, J. B. Mitton, and S.-K. Wu. Paternal mitochondrial DNA differentiation far  
790 exceeds maternal mitochondrial DNA and allozyme differentiation in the freshwater  
791 mussel, *Anodonta grandis grandis*. *Evolution*, pages 952–957, 1996.
- 792 [55] P. Lubet, N. Devauchelle, M. Muzellec, Y. Paulet, R. Faveris, and J. Dao. Reproduction  
793 of *Pecten maximus* from different fisheries areas Rade de Brest, Baie de St Brieuc, Baie  
794 de Seine. In *Fisheries, Biology and Aquaculture of Pectinids*, 8th International Pectinid  
795 Workshop, pages 22–29, Cherbourg (France), 1991.
- 796 [56] M. Lubosny, A. Przulucka, B. Smietanka, and A. Burzynski. *Semimytilus algosus*: first  
797 known hermaphroditic mussel with doubly uniparental inheritance of mitochondrial  
798 DNA. *Scientific Reports*, 10(1):1–12, 2020.
- 799 [57] P. C. Luttikhuisen, J. Drent, and A. Baker. Disjunct distribution of highly diverged  
800 mitochondrial lineage clade and population subdivision in a marine bivalve with pelagic  
801 larval dispersal. *Molecular Ecology*, 12:2215–2229, 2003.
- 802 [1] C. A. Maggs, R. Castilho, D. Foltz, C. Henzler, M. T. Jolly, J. Kelly, J. Olsen, K. E.  
803 Perez, W. Stam, R. Vainölä, et al. Evaluating signatures of glacial refugia for North  
804 Atlantic benthic marine taxa. *Ecology*, 89(sp11): S108–S122, 2008.
- 805 [58] G. M. Martin-Garcia. Oceanic impact on European climate changes during the  
806 Quaternary. *Geosciences*, 9(3):119, 2019.
- 807 [59] J. McDonald and M. Kreitman. Adaptive protein evolution at the *Adh* locus in  
808 *Drosophila*. *Nature*, 351:652–654, 1991.
- 809 [60] B. Meehan. A genetic comparison of *Macoma balthica* (Bivalvia: Telinidae) from the  
810 eastern and western North Atlantic Ocean. *Marine Ecology Progress Series*, 28:69–76,  
811 1985.
- 812 [61] L. Milani, F. Ghiselli, and M. Passamonti. Sex-linked mitochondrial behavior during  
813 early embryo development in *Ruditapes philippinarum* (Bivalvia Veneridae) a species  
814 with the doubly uniparental inheritance (DUI) of mitochondria. *Journal of Experimental*  
815 *Zoology Part B: Molecular and Developmental Evolution*, 318(3):182–189, 2012.
- 816 [62] R. Nikula, P. Strelkov, and R. Vainölä. Diversity and trans-arctic invasion history of  
817 mitochondrial lineages in the North Atlantic *Macoma balthica* complex (Bivalvia:  
818 Tellinidae). *Evolution*, 61(4):928–941, 2007.
- 819 [63] R. Nikula, P. Strelkov, and R. Vainölä. A broad transition zone between an inner Baltic  
820 hybrid swarm and a pure North Sea subspecies of *Macoma balthica* (Mollusca,  
821 Bivalvia). *Molecular Ecology*, 17(6):1505–1522, 2008.

- 822 [64] B. S. Ort and G. H. Pogson. Molecular population genetics of the male and female  
823 mitochondrial DNA molecules of the California sea mussel, *Mytilus californianus*.  
824 *Genetics*, 177(2):1087–1099, 2007.
- 825 [65] E. Pante, V. Becquet, A. Viricel, and P. Garcia. Investigation of the molecular signatures  
826 of selection on ATP synthase genes in the marine bivalve *Limecola balthica*. *Aquatic*  
827 *Living Resources*, 32(3):7, 2019.
- 828 [66] E. Pante, C. Poitrimol, A. Saunier, V. Becquet, and P. Garcia. Putative sex-linked  
829 heteroplasmy in the tellinid bivalve *Limecola balthica* (Linnaeus, 1758). *Journal of*  
830 *Molluscan Studies*, 83(2):226–228, 2017.
- 831 [67] E. Pante, A. Rohfritsch, V. Becquet, K. Belkhir, N. Bierne, and P. Garcia. SNP detection  
832 from De Novo transcriptome sequencing in the bivalve *Macoma balthica*: marker  
833 development for evolutionary studies. *PLoS ONE*, 7(12):e52302, 2012.
- 834 [68] E. Paradis. pegas: an R package for population genetics with an integrated–modular  
835 approach. *Bioinformatics*, 26(3):419–420, 2010.
- 836 [69] M. Passamonti. An unusual case of gender-associated mitochondrial DNA heteroplasmy:  
837 the mytilid *Musculista senhousia* (Mollusca Bivalvia). *BMC Evolutionary Biology*,  
838 7(Suppl 2)(S7), 2007.
- 839 [70] R. Pohlo. Evolution of the Tellinacea (Bivalvia). *Journal of Molluscan Studies*, 48:245–  
840 256, 1982.
- 841 [71] E. Quemere, J.-L. Bagliniere, J.-M. Roussel, G. Evanno, P. McGinnity, and S. Launey.  
842 Seascape and its effect on migratory life-history strategy influences gene flow among  
843 coastal brown trout (*Salmo trutta*) populations in the English Channel. *Journal of*  
844 *Biogeography*, 2016.
- 845 [72] R Core Team. R: A Language and Environment for Statistical Computing. R Foundation  
846 for Statistical Computing, Vienna, Austria, 2020.
- 847 [73] P. D. Rawson and T. J. Hilbish. Evolutionary relationships among the male and female  
848 mitochondrial DNA lineages in the *Mytilus edulis* species complex. *Molecular Biology*  
849 *and Evolution*, 12(5):893–901, 1995.
- 850 [74] C. Riginos and C. W. Cunningham. Hybridization in postglacial marine habitats.  
851 *Molecular Ecology*, 16(19):3971–3972, 2007.
- 852 [75] C. Riginos, M. J. Hickerson, C. M. Henzler, and C. W. Cunningham. Differential  
853 patterns of male and female mtDNA exchange across the Atlantic Ocean in the blue  
854 mussel, *Mytilus edulis*. *Evolution*, 58(11):2438–2451, 2004.

- 855 [76] T. Ruellet. Contribution à la dynamique de population de *Macoma balthica* en baie de  
856 Somme dans le cadre du projet COMORES. Technical Report 13-027, Rapport du  
857 GEMEL, 2013.
- 858 [77] C. Saavedra, D. T. Stewart, R. R. Stanwood, and E. Zouros. Species-specific segregation  
859 of gender-associated mitochondrial DNA types in an area where two mussel species  
860 (*Mytilus edulis* and *M. trossulus*) hybridize. *Genetics*, 143(3):1359–1367, 1996.
- 861 [78] A. Saunier. Bases génétiques de la différenciation adaptative en milieu anthropisé chez  
862 *Macoma balthica*, un bivalve marin à fort flux génique. PhD thesis, Université de La  
863 Rochelle, 2015.
- 864 [79] L. C. Shimmin, B. H.-J. Chang, and W.-H. Li. Male-driven evolution of DNA  
865 sequences. *Nature*, 362(6422):745–747, 1993.
- 866 [80] D. Skibinski, C. Gallagher, and C. Beynon. Sex-limited mitochondrial DNA  
867 transmission in the marine mussel *Mytilus edulis*. *Genetics*, 138(3):801–809, 1994.
- 868 [81] O. Skibinski, C. Gallaguer, and H. Quesada. On the roles of selection, mutation and drift  
869 in the evolution of mitochondrial DNA diversity in British *Mytilus edulis* (Mytilidae;  
870 Mollusca) populations. *Biological Journal of the Linnean Society*, 68:195–213, 1999.
- 871 [82] B. Smietanka and A. Burzynski. Disruption of doubly uniparental inheritance of  
872 mitochondrial DNA associated with hybridization area of European *Mytilus edulis* and  
873 *Mytilus trossulus* in Norway. *Marine Biology*, 164(11):209, 2017.
- 874 [83] B. Smietanka, A. Burzynski, and R. Wenne. Molecular population genetics of male and  
875 female mitochondrial genomes in European mussels *Mytilus*. *Marine Biology*,  
876 156(5):913–925, 2009.
- 877 [84] B. Smietanka, M. Zbawicka, T. Sanko, R. Wenne, and A. Burzynski. Molecular  
878 population genetics of male and female mitochondrial genomes in subarctic *Mytilus*  
879 *trossulus*. *Marine Biology*, 160(7):1709–1721, 2013.
- 880 [85] D. T. Stewart, E. R. Kenchington, R. K. Singh, and E. Zouros. Degree of selective  
881 constraint as an explanation of the different rates of evolution of gender-specific  
882 mitochondrial DNA lineages in the mussel *Mytilus*. *Genetics*, 143(3):1349–1357, 1996.
- 883 [86] D. T. Stewart, C. Saavedra, R. R. Stanwood, A. O. Ball, and E. Zouros. Male and female  
884 mitochondrial DNA lineages in the blue mussel (*Mytilus edulis*) species group.  
885 *Molecular Biology and Evolution*, 12(5):735–747, 1995.
- 886 [87] P. Strelkov, R. Nikula, and R. Väinölä. *Macoma balthica* in the White and Barents Seas:  
887 properties of a widespread marine hybrid swarm (Mollusca: Bivalvia). *Molecular*  
888 *Ecology*, 16(19):4110–4127, 2007.

- 889 [88] H. Stuckas, K. Stoof, H. Quesada, and R. Tiedemann. Evolutionary implications of  
890 discordant clines across the Baltic *Mytilus* hybrid zone (*Mytilus edulis* and *Mytilus*  
891 *trossulus*). *Heredity*, 103:146–156, 2009.
- 892 [89] F. Tajima. Evolutionary relationship of DNA sequences in finite populations. *Genetics*,  
893 105(2):437–460, 1983.
- 894 [90] F. Tajima. Statistical method for testing the neutral mutation hypothesis by DNA  
895 polymorphism. *Genetics*, 123(3):585–595, 1989.
- 896 [91] I. Theologidis, S. Fodelianakis, M. Gaspar, and E. Zouros. Doubly uniparental  
897 inheritance (DUI) of mitochondria DNA in *Donax trunculus* (Bivalvia: Donacidae) and  
898 the problem of its sporadic detection in Bivalvia. *Evolution*, 62(4):959–970, 2008.
- 899 [92] D. P. L. Toews and A. Brelsford. The biogeography of mitochondrial and nuclear  
900 discordance in animals. *Molecular Ecology*, 21(16):3907–3930, 2012.
- 901 [93] R.-E. Trejo-Salazar, G. Castellanos-Morales, D. Hernandez-Rosales, N. Gamez, J.  
902 Gasca-Pineda, M. R. M. Garza, R. Medellin, and L. E. Eguiarte. Discordance in maternal  
903 and paternal genetic markers in lesser long-nosed bat *Leptonycteris yerbabuena*, a  
904 migratory bat: recent expansion to the North and male phylopatry. *PeerJ*, 9:e12168,  
905 2021.
- 906 [94] M. Turelli and L. C. Moyle. Asymmetric Postmating Isolation: Darwin’s Corollary to  
907 Haldane’s Rule. *Genetics*, 176:1059–1088, 2007.
- 908 [95] R. Väinölä. Repeated trans-Arctic invasions in littoral bivalves: molecular zoogeography  
909 of the *Macoma balthica* complex. *Marine Biology*, 143(5):935–946, 2003.
- 910 [96] E. Zouros. The exceptional mitochondrial DNA system of the mussel family Mytilidae.  
911 *Genes & Genetic Systems*, 75(6):313–318, 2000.
- 912 [97] E. Zouros. Biparental inheritance through uniparental transmission: the doubly  
913 uniparental inheritance (DUI) of mitochondrial DNA. *Evolutionary Biology*, 40:1–31,  
914 2013.
- 915 [98] E. Zouros, A. O. Ball, C. Saavedra, and K. R. Freeman. An unusual type of  
916 mitochondrial DNA inheritance in the blue mussel *Mytilus*. *Proceedings of the National*  
917 *Academy of Sciences*, 91(16):7463–7467, 1994.
- 918
- 919

## 920 **Legends**

921 Figure 1: Median joining networks constructed from the haplotypes found among the 313  
922 individuals distributed in 17 sampling sites for (A) the *cox1f* gene (479bp) and (C) the  
923 *cox1m-long* gene (676bp). Haplotype associations among haplogroups are represented with a  
924 tanglegram (B) with bold lines highlighting individuals sharing distant haplogroups

925

926 Figure 2: Geographical distribution of the *cox1f* and *cox1m-long* haplogroups: haplogroup  
927 frequencies are represented for each marker in all the sites with a pie chart. The size of the  
928 pie chart indicates the number of individuals analyzed.

929

930 Figure 3: Heatmap representing linkage disequilibrium among haplogroups of *cox1f* and  
931 *cox1m-long*. Color key is based on correlation values among haplogroups and cell value  
932 represent the observed frequencies of each possible association. Dendrogram based on  
933 pairwise distance between main haplotypes of each haplogroup using the Tamura-Nei  
934 nucleotide substitution model and a gamma correction of 0.1150 and 0.1450 for *cox1f* and  
935 *cox1m-long* respectively.

936

937 Figure 4: Bayesian skyline plots for North and South subpopulations illustrating effective  
938 population size ( $N_e$ ) variation through time for both markers. The lines represent the mean  
939 effective population size, and the colored area represent 95% higher and lower confidence  
940 interval of posterior probabilities Here the 90 My divergence time with the *Donax* genus is  
941 considered ( $5.19 \times 10^{-2}$  substitution/site/My).

942

943 Figure 5: Comparison of pairwise  $\Phi_{ST}$  estimated at the *cox1f* gene between common sampling  
944 sites studied in Becquet et al (2012) (males and females) and the present study (males only).  
945 The plain line represents the  $x=y$  axis and the dash line, the linear regression ( $y = 1.27 x +$   
946  $0.03$ ,  $df = 62$ ,  $R^2_{adj}=0.74$ ,  $p<0.001$ ). A Mantel test revealed a significant correlation between  
947 the two datasets ( $r=0.786$ ,  $p=0.0084$ ).

948

949

950

951 Table 1: Genetic diversity indices at *cox1f* (479bp) and *cox1m* (479bp) loci for each sampling  
952 site: n: number of individuals, nsites: number of polymorphic sites, H: number of haplotypes,  
953  $\pi$ : nucleotide diversity, Hd: Haplotype diversity and D: Tajima's D coefficient.  $N_{eF}/N_{eM}$ : the  
954 ratio of female to male effective population size \* indicates significant values ( $<0.05$ , 10000  
955 permutations), Na: not available

| Geographic zone  | Sampling site           | n         | <i>cox1f</i> |             |             |              | <i>cox1m</i> |           |             |             |               | N <sub>ef</sub> /N <sub>eM</sub> |       |
|------------------|-------------------------|-----------|--------------|-------------|-------------|--------------|--------------|-----------|-------------|-------------|---------------|----------------------------------|-------|
|                  |                         |           | nsites       | H           | $\pi(10^2)$ | Hd           | D            | nsites    | H           | $\pi(10^2)$ | Hd            |                                  | D     |
| North            | Umea (UME)              | 2         | 6            | 2           | 1.41        | -            | -            | 12        | 2           | 2.5         | -             | -                                | -     |
|                  | Lomma (LOM)             | 6         | 7            | 3           | 0.81        | -            | -            | 4         | 3           | 0.28        | -             | -                                | -     |
|                  | Mecklenburg bight (MEC) | 3         | 4            | 3           | 0.61        | -            | -            | 10        | 3           | 1           | -             | -                                | -     |
|                  | Sylt (SYL)              | 7         | 7            | 4           | 0.91        | -            | -            | 5         | 4           | 0.38        | -             | -                                | -     |
|                  | Wilhelmshaven (WIL)     | 3         | 0            | 1           | 0.00        | -            | -            | 1         | 3           | 0.13        | -             | -                                | -     |
|                  | Crildumersiel (CRI)     | 10        | 6            | 2           | 0.77        | 0.53         | 2.10         | 14        | 9           | 0.70        | 0.98          | -1.47                            | 0.04  |
|                  | Kruiningen (KRU)        | 22        | 11           | 7           | 0.77        | 0.69         | 0.11         | 10        | 22          | 0.23        | 0.65          | -2.00*                           | 2.30  |
| <i>all</i>       | 42                      | 11        | 7            | 0.75±0.43   | 0.64±0.06   | 0.75         | 23           | 16        | 0.36±0.24   | 0.79±0.05   | -2.26*        | 0.91                             |       |
| Center           | Le Crotoy (CRO)         | 28        | 13           | 7           | 0.77        | 0.58         | -0.24        | 14        | 14          | 0.38        | 0.88          | -1.68*                           | 0.36  |
|                  | Saint Vaast (VAA)       | 31        | 11           | 5           | 0.33        | 0.24         | -1.63*       | 11        | 9           | 0.27        | 0.75          | -1.69*                           | 0.29  |
|                  | <i>all</i>              | 59        | 14           | 9           | 0.52±0.31   | 0.42±0.08    | -0.79        | 20        | 20          | 0.32±0.21   | 0.81±0.04     | -1.99*                           | 0.33  |
| Hybrid/Finistère | Mont Saint Michel (MSM) | 31        | 8            | 4           | 0.22        | 0.24         | -1.60*       | 5         | 7           | 0.11        | 0.35          | -1.51*                           | 1.11  |
|                  | Saint Brieuc (BRI)      | 30        | 15           | 9           | 0.76        | 0.99         | 0.17         | 4         | 5           | 0.08        | 0.36          | -1.58*                           | 337.1 |
|                  | <i>all</i>              | 61        | 16           | 10          | 0.74±0.42   | 0.58±0.07    | -0.28        | 8         | 10          | 0.09±0.09   | 0.35±0.08     | -1.91*                           | 4.9   |
| South            | Pont Mahé (MAH)         | 30        | 8            | 6           | 0.18        | 0.36         | -1.86*       | 5         | 6           | 0.07        | 0.31          | -2.00*                           | 2.4   |
|                  | Saint Brevin (BRE)      | 29        | 9            | 8           | 0.71        | 0.49         | -0.25        | 8         | 9           | 0.13        | 0.53          | -2.14*                           | 1.6   |
|                  | Noirmoutier (NOI)       | 8         | 3            | 4           | 0.23        | -            | -            | 1         | 2           | 0.05        | -             | -                                | -     |
|                  | Aytré (AYT)             | 33        | 8            | 6           | 0.43        | 0.55         | -0.18        | 5         | 6           | 0.07        | 0.28          | -1.88*                           | 6.0   |
|                  | Fouras (FOU)            | 30        | 8            | 7           | 0.29        | 0.50         | -1.12        | 6         | 6           | 0.08        | 0.31          | -2.10*                           | 4.2   |
|                  | <i>all</i>              | 63        | 11           | 10          | 0.36±0.23   | 0.52±0.07    | -0.89        | 9         | 9           | 0.08±0.08   | 0.29±0.07     | -2.15*                           | 5.09  |
|                  | Arcachon (ARC)          | 10        | 5            | 3           | 0.23        | 0.38         | -1.74*       | 1         | 2           | 0.04        | 0.2           | -1.11                            | 4.70  |
| <b>All</b>       | <b>313</b>              | <b>37</b> | <b>37</b>    | <b>0.85</b> | <b>0.76</b> | <b>-1.13</b> | <b>55</b>    | <b>64</b> | <b>0.42</b> | <b>0.70</b> | <b>-2.28*</b> | <b>2.60</b>                      |       |

bioRxiv preprint doi: <https://doi.org/10.1101/2022.02.28.479517>; this version posted March 2, 2022. The copyright holder for this preprint (which was not certified by peer review) is the author/funder, who has granted bioRxiv a license to display the preprint in perpetuity. It is made available under aCC-BY-NC-ND 4.0 International license.

958

959 Table 2: Analysis of molecular variance (AMOVA) to partition the genetic variation among hierarchical geographical scales. Results are  
 960 presented for both markers, with different options of hierarchical grouping of subpopulations.  
 961

| Number of groups | Groups                                                  |                  | <i>coxIf</i>                            |                                    |                                                 | <i>CoxIm</i>                            |                                    |                                                 |
|------------------|---------------------------------------------------------|------------------|-----------------------------------------|------------------------------------|-------------------------------------------------|-----------------------------------------|------------------------------------|-------------------------------------------------|
|                  |                                                         |                  | Among groups relative to total variance | Among subpopulations within groups | Among subpopulations relative to total variance | Among groups relative to total variance | Among subpopulations within groups | Among subpopulations relative to total variance |
| 3                | (CRI,KRU)<br>(CRO,VAA,MSM,BRI)<br>(MAH,BRE,AYT,FOU,ARC) | % var            | 44.71                                   | 7                                  | 48.29                                           | 22.2                                    | 22.54                              | 55.26                                           |
|                  |                                                         | Fixation indices | $\Phi_{CT}=0.447^{***}$                 | $\Phi_{SC}=0.517^{***}$            | $\Phi_{ST}=0.126^{**}$                          | $\Phi_{CT}=0.221^{ns}$                  | $\Phi_{SC}=0.290^{***}$            | $\Phi_{ST}=0.447^{***}$                         |
| 2                | (CRI,KRU,CRO,VAA)<br>(MSM,BRI,MAH,BRE,AYT,FOU,ARC)      | % var            | 16.98                                   | 31.02                              | 52                                              | 57.36                                   | 0.56                               | 42.08                                           |
|                  |                                                         | Fixation indices | $\Phi_{CT}=0.170^{ns}$                  | $\Phi_{SC}=0.374^{***}$            | $\Phi_{ST}=0.480^{***}$                         | $\Phi_{CT}=0.574^{***}$                 | $\Phi_{SC}=0.013^{ns}$             | $\Phi_{ST}=0.579^{***}$                         |
| 2                | (CRI,KRU,CRO,VAA,MSM,BRI)<br>(MAH,BRE,AYT,FOU,ARC)      | % var            | 49.14                                   | 6.4                                | 44.46                                           | 21.88                                   | 4.18                               | 53.94                                           |
|                  |                                                         | Fixation indices | $\Phi_{CT}=0.491^{***}$                 | $\Phi_{SC}=0.126^{***}$            | $\Phi_{ST}=0.555^{**}$                          | $\Phi_{CT}=0.212^*$                     | $\Phi_{SC}=0.309^{***}$            | $\Phi_{ST}=0.460^{**}$                          |

962 \*P>0.05, \*\*P>0.01, \*\*\*P < 0.001, ns: non significant

963



964

965 Table 3: McDonald and Kreitman contingency table: the number of non-synonymous and  
 966 synonymous substitutions within and among mitotypes for the two *L. balthica* genetic  
 967 lineages, the neutrality index (NI) and the results from the Fisher Exact and G tests.

968

969

| Group        | <i>coxIf</i> vs. <i>coxIm</i><br>segregating sites | Polymorphic | Fixed | NI    | Fisher<br>Exact Test |           |
|--------------|----------------------------------------------------|-------------|-------|-------|----------------------|-----------|
|              |                                                    |             |       |       | Pvalue               | G test    |
| <b>North</b> |                                                    |             |       |       |                      |           |
|              | Non-synonymous                                     | 2           | 56    | 0.083 | <0.0001              | 20.165*** |
|              | Synonymous                                         | 32          | 74    |       |                      |           |
| <b>South</b> |                                                    |             |       |       |                      |           |
|              | Non-synonymous                                     | 2           | 54    | 0.107 | <0.0002              | 15.111*** |
|              | Synonymous                                         | 29          | 84    |       |                      |           |

970 \*\*\*P < 0.0001,

971

972 Table 4: Measures of nonsynonymous to synonymous (i) nucleotide diversity  
 973 within each mitotype ( $\pi_a$ ,  $\pi_s$ ) and (ii) number of substitutions among mitotypes ( $K_a$ ,  $K_s$ ) using  
 974 the Jukes and Cantor correction

|       |   | Intra mitotype ( $10^2$ ) |         |       | Inter-mitotype |       |             |
|-------|---|---------------------------|---------|-------|----------------|-------|-------------|
|       |   | $\pi_a$                   | $\pi_s$ | ratio | $K_a$          | $K_s$ | ratio       |
| North | f | 0.000                     | 2.779   | 0.000 | 0.201          | 2.008 | 0.100±0.028 |
|       | m | 0.026                     | 1.401   | 0.018 |                |       |             |
| South | f | 0.011                     | 1.421   | 0.008 | 0.201          | 2.086 | 0.097±0.031 |
|       | m | 0.005                     | 0.348   | 0.015 |                |       |             |
| All   | f | 0.008                     | 2.733   | 0.003 | 0.201          | 2.063 | 0.098±0.029 |
|       | m | 0.012                     | 1.037   | 0.011 |                |       |             |

975

(A) *cox1f*:

N=313

H=37

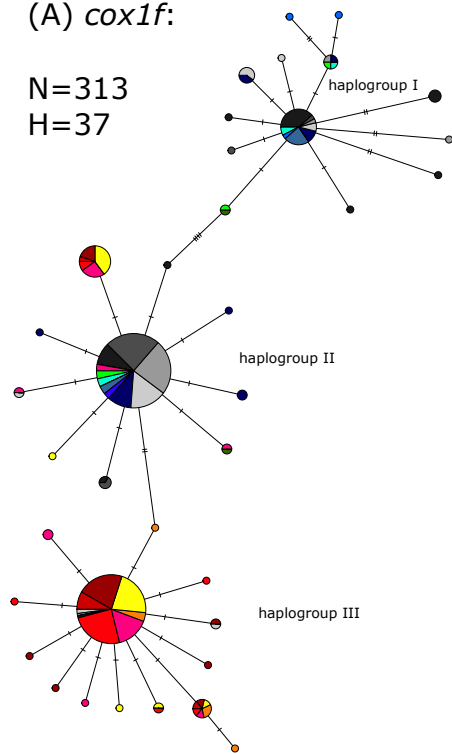

(B)

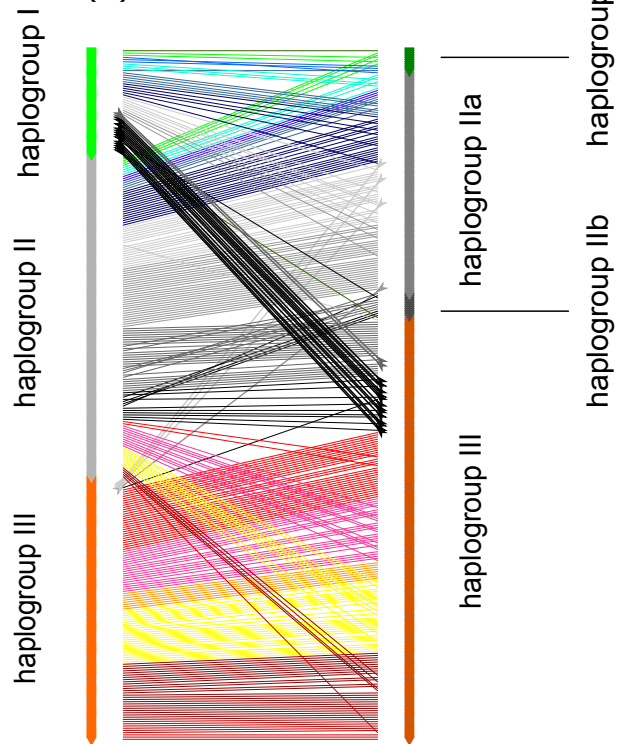

*cox1f*

*cox1m-long*

(C) *cox1m-long* :

N=313

H=81

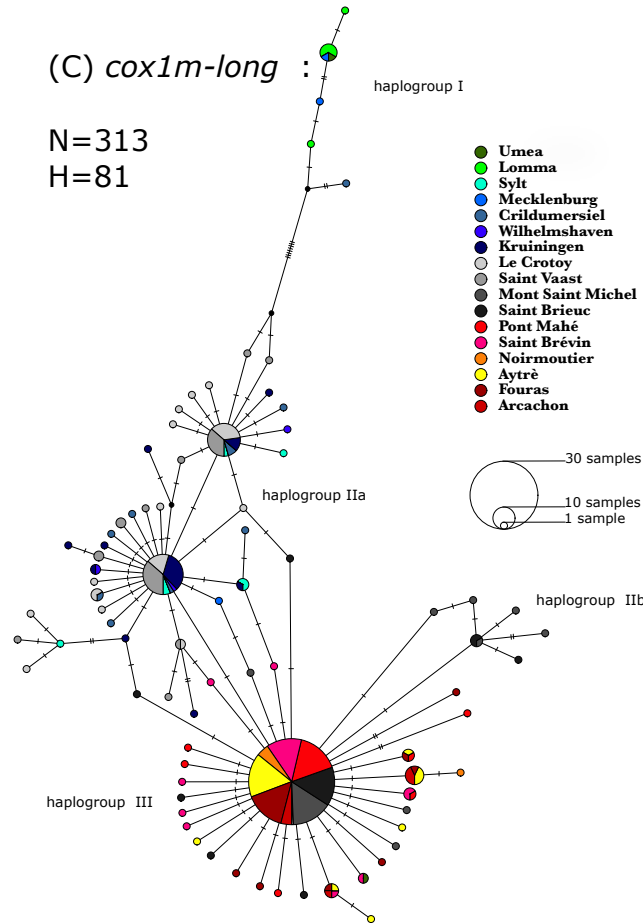

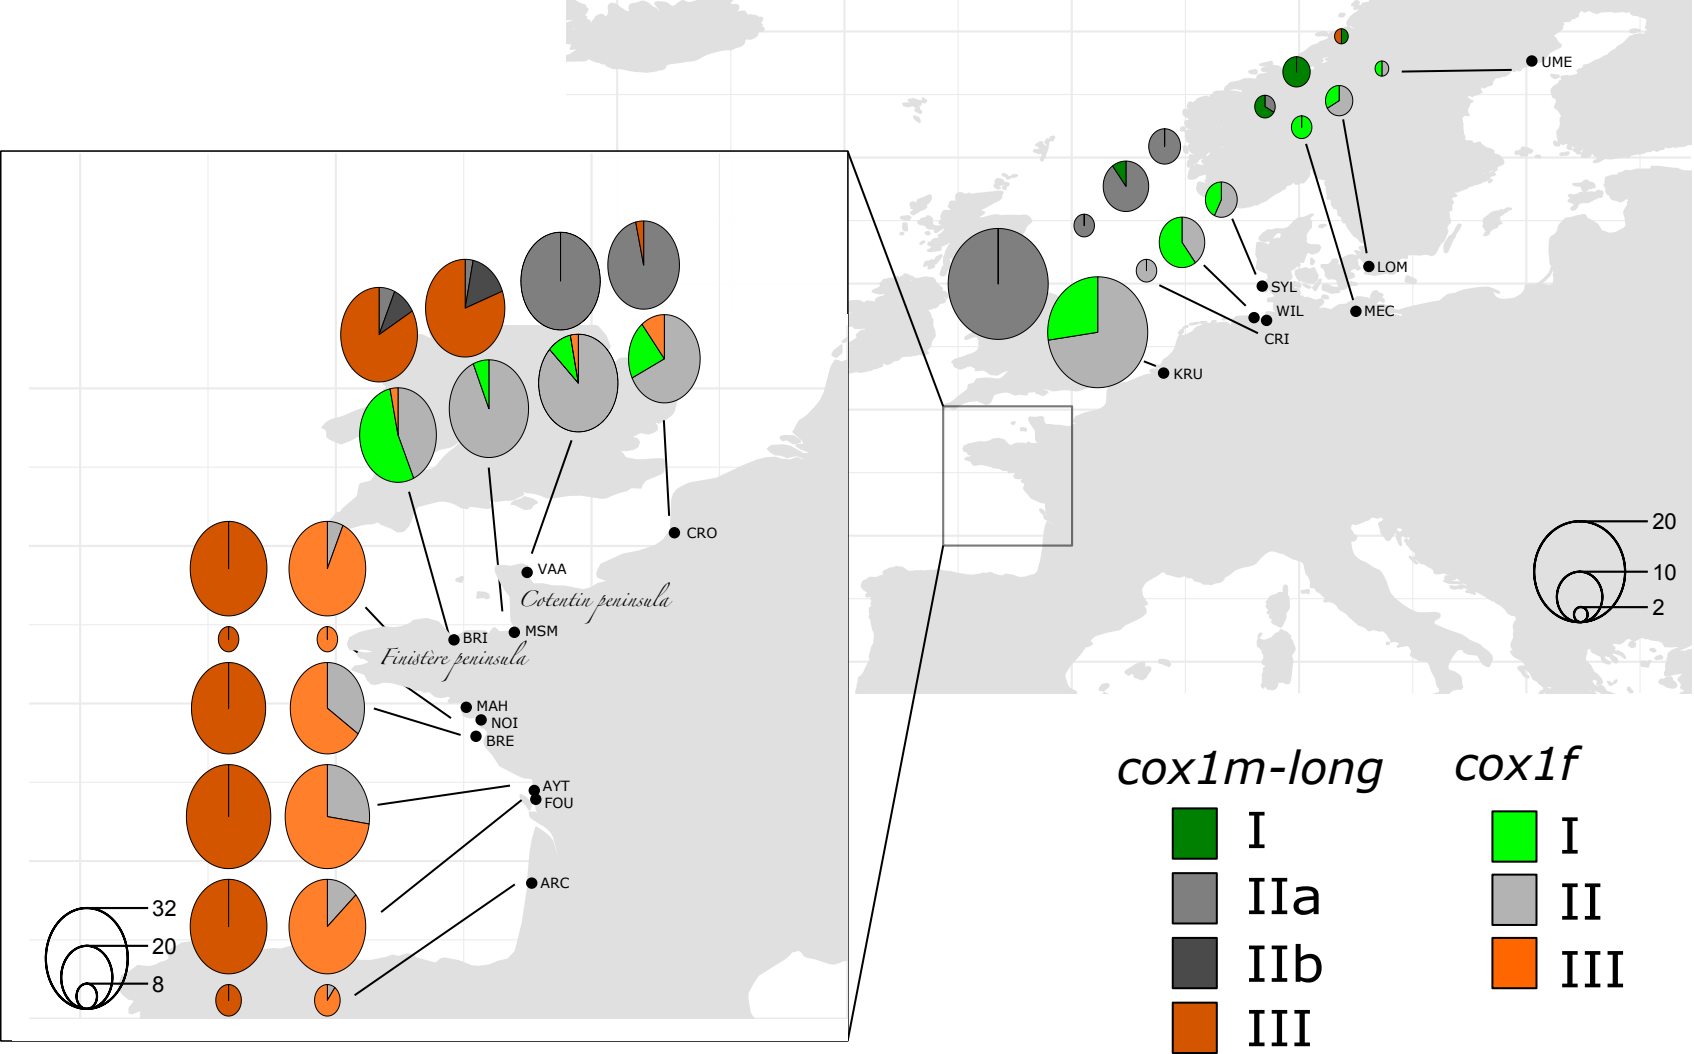

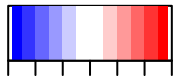

-0.6      0      0.4

Correlations among haplotypes

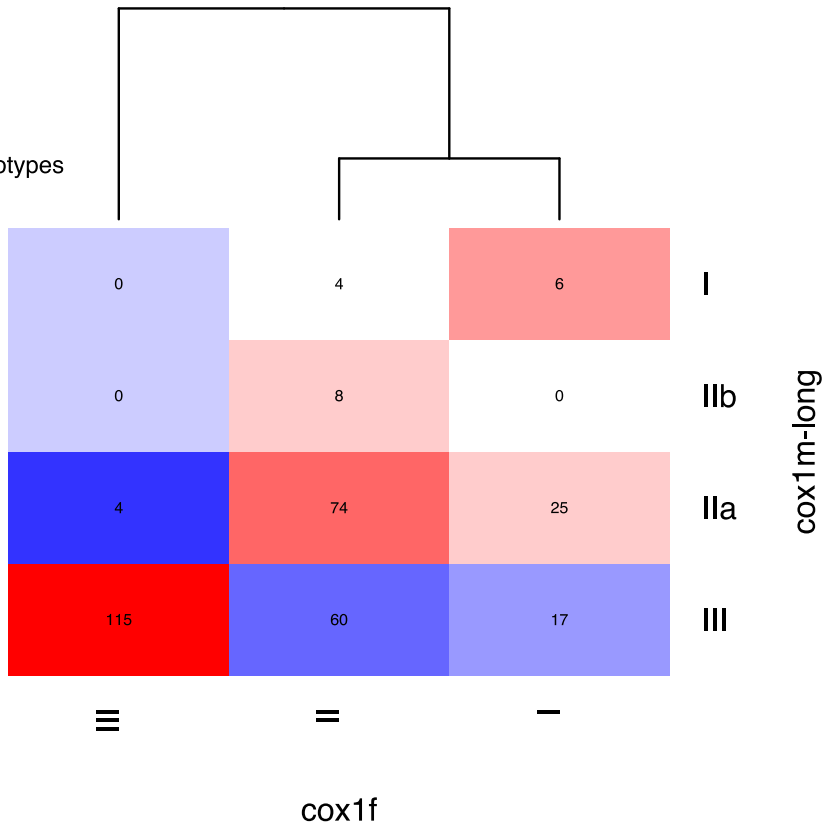

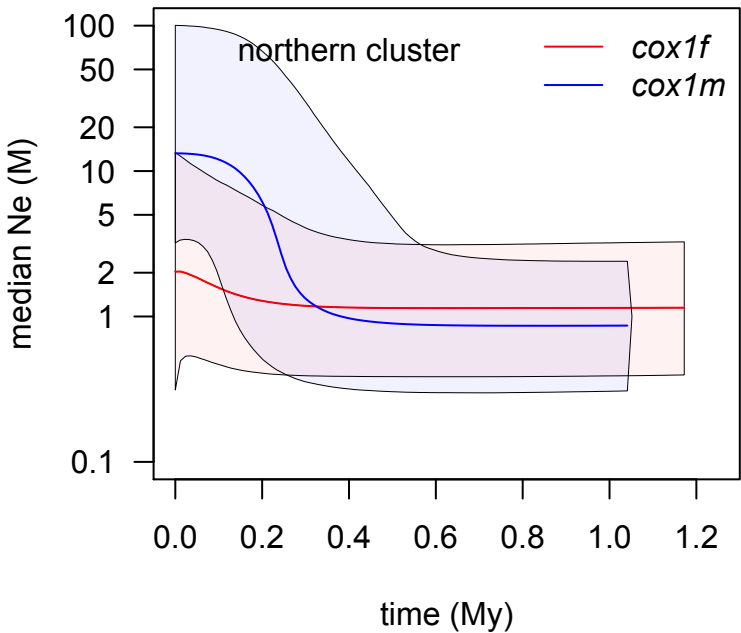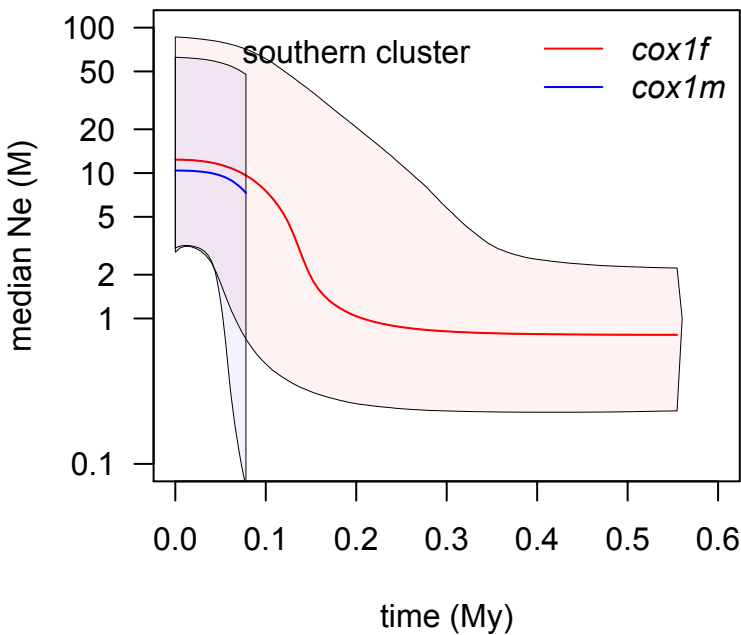

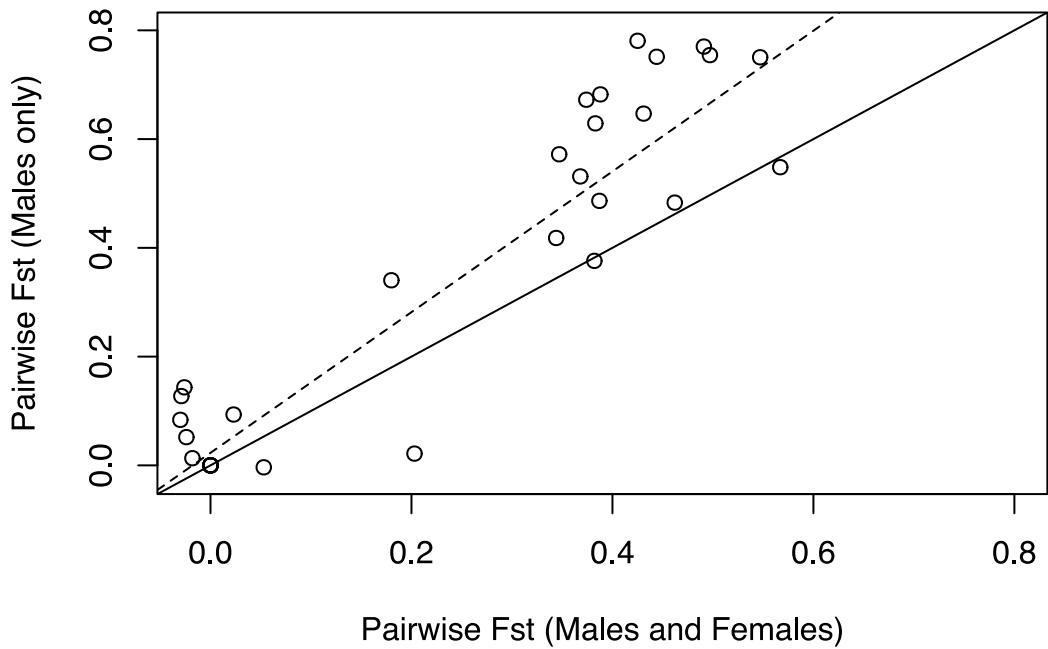

Source: https://www.biorxiv.org/content/biorxiv/early/2022/03/02/2022.02.28.479517.full.pdf
